## **Abelson kinase's intrinsically disordered linker plays important roles in protein function and protein stability**

Edward M. Rogers<sup>1</sup>, S. Colby Allred<sup>1</sup>, and Mark Peifer<sup>1,2</sup>

1 Department of Biology and 2 Lineberger Comprehensive Cancer Center, University of North Carolina at Chapel Hill, Chapel Hill, NC 27599, USA

\* To whom correspondence should be addressed

Email: [peifer@unc.edu](mailto:peifer@unc.edu)

Phone: (919) 962-2272

## Abstract

The non-receptor tyrosine kinase Abelson (Abl) and its family members play conserved roles in embryonic development, wiring of the nervous system, and tissue homeostasis, while inappropriate activation can promote leukemia. Abl is a multidomain protein that uses its kinase activity and multiple protein interaction sites to organize a signaling complex, linking cell-cell signals to cytoskeletal and transcriptional outputs. One shared feature in the family is a long intrinsically disordered region (IDR) linking the kinase domain and the C-terminal F-actin binding domain. This is less well conserved, and different Abl family members contain motifs within this region thought to mediate distinct protein interactions. Previous work has begun to assess the function of different parts of the IDR, but here we ask a simple question—what is the effect of completely deleting the IDR on Abl function (Abl $\Delta$ IDR), using the single Abl family member in *Drosophila* as a model? Our data suggest that the IDR is key to Abl function—removing it reduces Abl function more profoundly than eliminating kinase activity, deleting the F-actin binding domain or mutating individual conserved sites in the IDR. In fact, in some contexts Abl $\Delta$ IDR has apparent dominant effects, leading to a phenotype worse than that seen in an *abl* null mutant. We also find that the IDR has a role in regulating stability of Abl protein, as Abl $\Delta$ IDR is substantially more stable than wildtype Abl. These data provide new insights into Abl function.

## Introduction

Non-receptor tyrosine kinases like Src and Abelson (Abl) kinases play key roles in signal transduction, regulating embryonic development and tissue homeostasis. Through mutational activation of themselves or their upstream regulators, they also play important roles in oncogenesis. Abl family members provide outstanding examples. They regulate morphogenetic movements during embryogenesis in both mammals and *Drosophila*, where they also play key roles in neural development, axon outgrowth, and synaptogenesis (reviewed in MORESCO AND KOLESKE 2003; BRADLEY AND KOLESKE 2009; KHATRI *et al.* 2016; KANNAN AND GINIGER 2017). They can act downstream of diverse receptors, including receptor tyrosine kinases or receptor serine/threonine kinases, as well as the cell-matrix and cell-cell adhesion receptors, integrins and cadherins. Downstream, they often activate cytoskeletal effectors to directly regulate cell behavior, though action through transcriptional effectors is also important.

Mammalian Abl was originally identified as a viral oncogene carried by a retrovirus, and later identified as an initiating oncogene in many cases of chronic myelogenous and acute lymphoblastic leukemia (REN 2005). In these disorders characteristic translocations are found that fuse the *Bcr* and *Abl* genes, removing a negative-regulatory myristoylation sequence at Abl's N-terminus, thus rendering the kinase constitutively active. Drugs targeting Abl kinase activity like Gleevec have emerged as paradigms of targeted therapy (SAWYERS *et al.* 2002; TALPAZ *et al.* 2002).

Mammals have two Abl family members, Abl and Abl-related gene (Arg). They have partially redundant functions in development and tissue homeostasis. *Abl* single mutant mice die neonatally with thymic and splenic atrophy, T and B cell lymphopenia, osteoporosis, and cardiac defects (SCHWARTZBERG *et al.* 1991; TYBULEWICZ *et al.* 1991; HARDIN *et al.* 1995; HARDIN *et al.* 1996; LI *et al.* 2000; QIU *et al.* 2010b). Conditional knockout confirmed roles in T cells (ZIPFEL *et al.* 2004; GU *et al.* 2007; HUANG *et al.* 2008). *Arg* single mutant mice are viable with grossly normal brains, but exhibit multiple behavioral defects (KOLESKE *et al.* 1998), likely linked to a reduced ability to maintain dendrites (LIN *et al.* 2013). They also have subtle defects in muscle development (LEE *et al.* 2017). In contrast, loss of both Abl and Arg leads to embryonic lethality at day 11, with a failure to complete neural tube closure. Conditional knockout strategies have revealed additional important redundant roles including those in cerebellar (QIU *et al.* 2010a), cerebral (MORESCO *et al.* 2005), and endothelial development and barrier function (CHISLOCK AND PENDERGAST 2013; CHISLOCK *et al.* 2013).

*Drosophila* has a single Abl family member, simplifying analysis of its roles in development and homeostasis. In the 1980s Michael Hoffmann and his lab identified the first mutations in fly Abl, as part of a pioneering effort to define the normal roles of important human oncogenes (HENKEMEYER *et al.* 1987). Others built on these early efforts. Like its mammalian homologs, Abl plays important roles in embryonic and postembryonic neural development. These analyses revealed roles for Abl downstream of diverse axon guidance receptors, including DCC/Frazzled, Robo, Plexin, Eph, and Notch (reviewed in (KANNAN AND GINIGER 2017)). Genetic and cell biological analyses also revealed Abl's downstream effectors. Most prominent is Enabled (Ena), a protein that binds the growing end of actin filaments and promotes their elongation. Abl negatively regulates Ena (GERTLER *et al.* 1990), though the mechanism remains unclear. Trio, a GTP exchange factor (GEF) for the small GTPase Rac, also is an Abl effector.

Subsequent analysis of embryos lacking both maternal and zygotic Abl revealed additional roles in non-neural tissues—these include diverse events ranging from the actin-dependent cellularization process, apical constriction of mesoderm precursors, cell intercalation during germband elongation, and collective cell migration during germband retraction, dorsal closure, and head involution (GREVENGOED *et al.* 2001; GREVENGOED *et al.* 2003; FOX AND PEIFER 2007; TAMADA *et al.* 2012). In these events, regulation by and of the cadherin-based cell adhesion machinery plays a role, while Ena remains a critical downstream target (GREVENGOED *et al.* 2001; GREVENGOED *et al.* 2003; FOX AND PEIFER 2007).

All Abl family members share with Src a highly conserved set of N-terminal domains (Fig. 1A). These include a Src homology 2 (SH2) domain that binds specific peptides carrying a phosphorylated tyrosine, an SH3 domain that binds specific proline-rich peptides, and the conserved tyrosine kinase domain (COLICELLI 2010). However, unlike Src, Abl family members have long C-terminal extensions, with a C-terminal F-actin-binding domain (FABD) separated from the N-terminal module by a long, less well conserved linker that is predicted to be intrinsically disordered (referred to here as the IDR). Different family members share peptide motifs within this region that can or are predicted to bind actin, microtubules, Ena/VASP family members, and proteins carrying SH3 domains. The only peptide motif in the IDR clearly conserved between mammals and *Drosophila* is a PPPX motif that in mammals binds both SH2/SH3 adapters like Crk and NCK and the actin regulator Abl interacting protein (Abi) (HOSSAIN *et al.* 2012; GREGOR *et al.* 2019).

Abl kinase activity has been a focus of much attention, particularly after the success of Abl kinase inhibitors like Gleevec in the treatment of leukemia. However, the simple picture of Abl as a kinase that acts

solely by phosphorylating downstream proteins rapidly proved inaccurate. Kinase-dead Abl rescues defects in both adult viability and retinal development (HENKEMEYER *et al.* 1990). Analysis of its role in embryonic development suggest kinase activity is important for roles in both axon patterning and in morphogenesis, but that it retains significant residual function (O'DONNELL AND BASHAW 2013; ROGERS *et al.* 2016). More limited analysis implicated the SH2 domain in axon guidance (O'DONNELL AND BASHAW 2013). The extended C-terminal region of Abl, including both the intrinsically disordered linker and the C-terminal actin binding domain, is essential for function, as the *abl<sup>1</sup>* allele, which encodes a stable protein truncated soon after the kinase domain, behaves genetically as a null allele (HENKEMEYER *et al.* 1987); similar results were seen in mice where a truncated protein resembled the null (SCHWARTZBERG *et al.* 1991; TYBULEWICZ *et al.* 1991). The simplest explanation would be that this reflected an essential function of the FABD. However, surprisingly Abl lacking the FABD can fully rescue viability and fertility, though detailed analysis of axon patterning and synergistic effects with loss of kinase activity suggest it does play a supporting role (O'DONNELL AND BASHAW 2013; ROGERS *et al.* 2016; CHEONG AND VANBERKUM 2017).

These data opened up potential roles for the IDR. The past decade has revealed unexpected and important roles for IDRs in diverse cell functions, through their ability to power the multivalent interactions, including those that enable assembly of “biomolecular condensates”. These organize proteins and RNAs into non-membrane bound cellular compartments that carry out diverse functions ranging from regulating transcription to RNA processing and RNP assembly to the DNA damage response, to cellular signaling (BANANI *et al.* 2017; HOLEHOUSE AND PAPPU 2018). Biomolecular condensates assemble by multivalent interactions among their protein and RNA components, leading to “phase separation”. Not all proteins that contain IDRs have been shown to form biomolecular condensates, but it is intriguing to note that proteins containing SH2 and SH3 domains were among the first proteins shown to assemble by this mechanism (LI *et al.* 2012), and that Abl clearly can assemble into a large macromolecular complex (e.g. (GREGOR *et al.* 2019).

As noted above, Abl's IDR is not highly conserved in primary sequence, even between the two mammalian paralogs (Fig. 1A). Only a single peptide is conserved among fly and mammalian family members—the PXXP SH3-domain binding motif in the N-terminal quarter of the IDR. There are other peptide motifs that are conserved over shorter phylogenetic distances; e.g., among insect Abl proteins. These include a predicted Ena binding site in the insect proteins. There are also functional motifs present only in single family members, including the microtubule and second actin interaction sites in mammalian Arg (MILLER *et al.* 2004;

COURTEMANCHE *et al.* 2015). Two groups assessed the function of the *Drosophila* Abl IDR, taking different approaches. Our lab individually deleted short conserved regions of 12–56 amino acids, referred to as CR1–CR4, in the context of a GFP-tagged full length Abl protein driven by its endogenous promoter (Fig. 1B). We measured rescue of embryonic and adult viability, morphogenetic movements in the embryo, and axon outgrowth in the embryonic central nervous system (ROGERS *et al.* 2016). Cheong and VanBerkum took a more comprehensive approach, deleting successively smaller fractions of the C-terminal region (including the FABD)—beginning by dividing it in half, then in quarters and then focusing in on two smaller regions, with smaller deletions and point mutations. They expressed their mutant proteins in the background of zygotic *abl* mutants using the GAL4-UAS system and assessed rescue of axon pathfinding (CHEONG AND VANBERKUM 2017). Both approaches led to similar surprising conclusions. Only a single region of the IDR plays a major role in Abl function—the region containing the conserved PXXP motif. Surprisingly, however, this motif was extremely important, as its deletion caused as great or greater reduction in Abl function as loss of kinase activity or even loss of both kinase activity and the FABD. Subsequent analyses support the idea that this motif acts by interactions with the adapter protein Crk (SPRACKLEN *et al.* 2019) and with the actin-regulatory WAVE-regulatory complex (CHEONG *et al.* 2020). The fine-grained dissections of the IDR by Cheong and VanBerkum suggest some of the other regions of the IDR may have more subtle roles in axon guidance.

Our analyses did not fully probe the function of the IDR, as we missed perhaps the simplest test of its function—completely deleting the IDR while leaving the FABD intact. We thus generated a mutation cleanly removing the IDR in the context of a GFP-tagged Abl construct driven by its endogenous promoter. This revealed surprising dominant-negative activity of Abl $\Delta$ IDR and a potential role for the IDR in regulation of Abl protein stability. These observations add to our understanding of Abl function.

## Results

### Creating a mutant to test the role of the IDR in Abl function

Abl is a multidomain protein which uses both its kinase activity and its protein interaction domains to create a signaling hub, integrating upstream signals and activating downstream effectors. Our lab previously created a series of *abl* mutants to assess the role of kinase activity and other domains and motifs in *Drosophila* (Fig. 1B; (ROGERS *et al.* 2016). The base construct was a P-element transgene containing a wild type *abl* gene driven by a 2kb fragment of the 5' upstream endogenous *abl* promoter (Tn Abl WT:GFP), which can fully rescue *abl*MZ mutant embryos (FOX AND PEIFER 2007). This construct as a C-terminal GFP tag, which does not impair its rescuing ability, and which allows direct visualization of Abl localization in live embryos. These included mutants deleting short conserved regions in the IDR, but we did not cleanly remove the IDR to assess its full set of roles. To do so, here we created a similar transgene that essentially deletes the entire IDR—below we refer to this as AblΔIDR (Fig. 1B; amino acids 662-1496 are deleted; see Methods for details). We added a 25 amino acid flexible linker (GGG)<sub>5</sub> in place of the IDR to reduce the likelihood of disrupting folding of the adjacent kinase domain and FABD. We introduced this transgene into the *Drosophila* genome in two ways—by P element-based transformation, selecting an insertion on then second chromosome, and by site specific integration the left arm of the 2nd chromosome at 22A3). We then used these transgenes to assess the roles of the IDR in Abl function.

### **AblΔIDR does not rescue adult viability and has apparent dominant negative effects on embryonic morphogenesis**

Because of its critical roles in embryonic morphogenesis and neuronal development, Abl is essential for both embryonic and adult viability (HENKEMEYER *et al.* 1987; GREVENGOED *et al.* 2001). The ability to rescue viability thus offered an initial test for our AblΔIDR mutant protein. Abl is maternally contributed and this maternal contribution is sufficient for embryonic development (GREVENGOED *et al.* 2001). However, most *abl* null mutants die as pupae—the few that escape are functionally sterile and die soon after eclosing (HENKEMEYER *et al.* 1987). We thus tested the ability of AblΔIDR to rescue adults that were heterozygous for the putative null allele *abl*<sup>4</sup> (FOX AND PEIFER 2007) and a Deficiency that removes the *abl* gene (*Df(3L)st-7 Ki; abl*<sup>4</sup>/*Df*), as we had for our earlier mutants (ROGERS *et al.* 2016). A targeted transgene encoding AblΔIDR provided partial but not complete rescue of adult viability. While unrescued *abl*<sup>4</sup>/*Df* adults had only 20% the viability of those rescued by our wildtype *abl* transgene, AblΔIDR; *abl*<sup>4</sup>/*Df* adults eclosed at 48% the rate of

those rescued by the wildtype transgene (Fig.1C ;Table 1). In contrast, Abl $\Delta$ FABD fully rescued adult viability, and even a mutant lacking both kinase activity and the FABD provided substantial rescue {Rogers, 2016 #4601}; 82% of the wildtype transgene). However, Abl $\Delta$ CR1, deleting the PXXP motif in the IDR, did not (31% viability relative to the wildtype transgene; Fig. 1C; Table 1; {Rogers, 2016 #4601}). These data suggest that the IDR is important for Abl function.

Unlike the *abl*<sup>4</sup>/*Df* escapers, Abl $\Delta$ IDR; *abl*<sup>4</sup>/*Df* adults lived long enough to mate and produce fertilized eggs. We thus asked whether Abl $\Delta$ IDR could rescue the lethality of embryos lacking both maternal and zygotic Abl, by crossing these females to males carrying the transgene who were heterozygous for *abl*<sup>4</sup>/+. Abl $\Delta$ IDR did not rescue the viability of maternal/zygotic mutants (50% of the progeny), and, surprisingly, even 30% of embryos that got a zygotic wildtype *abl* gene from their fathers died before hatching and the rest (20%) died as first instar larvae (Fig. 1D, Table 1). In contrast, Abl $\Delta$ FABD provided full rescue of embryonic viability (Fig. 1D; Table 1; {Rogers, 2016 #4601}). To get a rough assessment of the rescue of embryonic morphogenesis by Abl $\Delta$ IDR in this context, we examined the cuticles of the dead embryos. To our surprise, the cuticle phenotype was very severe, with all embryos exhibiting strong disruption of epidermal integrity, including embryos in which only fragments of cuticle were secreted (Fig. 2A vs B-D). These morphogenetic phenotypes are more severe than have been characteristically seen in *abl* maternal/zygotic mutant embryos (GREVENGOED *et al.* 2001; ROGERS *et al.* 2016). However, the limitations of this approach are that since unrescued *abl*<sup>4</sup>/*Df* mutant females are sterile, we could not compare the embryonic morphogenesis of their progeny to those rescued by Abl $\Delta$ IDR.

To circumvent this, we used the FLP/FRT/DFS approach (CHOU *et al.* 1993) to generate females whose germlines are homozygous for *abl*<sup>4</sup>, either in the presence of one of our transgenes or in the absence of any transgene as a control. This approach allowed us to compare maternal/zygotic *abl* mutants (*abl*MZ), who are homozygous for the null allele, with similar mutants that have one of our transgenes contributed both maternally and zygotically. We used *abl* Transgenes all inserted at the same chromosomal location via  $\phi$ C integrase. *abl*MZ mutants generated by the FLP/FRT/DFS approach are embryonic lethal (GREVENGOED *et al.* 2001), and there is only partial rescue of viability in the 50% of embryos that receive a wild-type *abl* gene paternally (9% overall embryonic viability (Fig. 1E; Table 1). Strikingly, Abl $\Delta$ IDR; *abl*MZ mutants had an even higher embryonic lethality (1% overall embryonic viability; probability that viability is lower than *abl*MZ  $p < 0.0001$ ; by Fisher's Exact test)). In contrast, our GFP-tagged wildtype transgene, provided strong rescue



(39% viability (ROGERS *et al.* 2016); we attribute the lack of full rescue to other mutations that have accumulated on the *abl*<sup>4</sup> chromosome), as did the AblΔFABD transgene (35% viability; (ROGERS *et al.* 2016).

We next examined embryonic cuticles, as they allow us to assess cell fate choice, major morphogenetic movements like germband retraction, head involution, and dorsal closure, along with epidermal integrity. *ablMZ* mutants have multiple defects in these processes (GREVENGOED *et al.* 2001; ROGERS *et al.* 2016); Fig 2F,G), with strong defects in head involution and failure of full germband retraction. Many also fail in dorsal closure, and a small fraction (15%) have defects in epidermal integrity. Our transgene encoding wildtype Abl largely rescued these defects (Fig. 2F,G; (ROGERS *et al.* 2016). Our previous analysis revealed that neither kinase activity or the FABD are essential for rescuing these cuticle defects, while AblΔCR1, lacking the conserved PXXP motif in the linker, largely rescued epidermal integrity but only partially rescued germband retraction and dorsal closure (ROGERS *et al.* 2016). In contrast, however, AblΔIDR; *ablMZ* mutants had even more severe cuticle defects than unrescued *ablMZ* mutants-the fraction of embryos with epidermal defects more than doubled, from 15% to 33% (probability that the cuticle defects are worse than *ablMZ*  $p < 0.0001$ ; by Fisher's Exact test). This epidermal disruption phenotype was similar to that we reported above in the progeny of AblΔIDR; *abl*<sup>4</sup>/*Df* females. Taken together, the increased embryonic lethality and higher proportion of severe cuticle defects in these experiments and the unexpectedly severe cuticle phenotype seen in our initial *abl*<sup>4</sup>/*Df* experiments, suggests that expressing AblΔIDR does not rescue loss of Abl, but instead worsens some aspects of the phenotype of these embryos.

#### **AblΔIDR does not effectively rescue defects in cellularization or mesoderm invagination**

Abl has diverse roles in embryonic development, ranging from regulating actin dynamics during syncytial development and cellularization to regulating apical constriction of mesodermal cells to regulating cell shape change and collective cell migration during germband retraction and dorsal closure. Our cuticle data suggested that AblΔIDR was substantially impaired in morphogenesis. To examine this more closely, we used immunofluorescence and confocal microscopy to examine cell shape changes and cytoskeletal regulation during embryonic development, as we had done to assess the roles of kinase activity, the FABD, and the conserved motifs in the IDR (ROGERS *et al.* 2016).

The first events of embryogenesis that require Abl function are the characteristic dynamics of the actin cytoskeleton during the syncytial stages and cellularization. Maternal/zygotic *abl* mutants (*ablMZ*) have defects in these processes, and thus accumulate multinucleate cells at the end of cellularization (GREVENGOED

*et al.* 2003); Fig. 3A vs B, red arrows). We found that that Abl $\Delta$ IDR did not fully rescue these defects, and thus Abl $\Delta$ IDR; *abl*MZ mutants accumulated multinucleate cells (Fig. 3A vs C). Abl is next required for the first event of gastrulation, in which cells along the ventral midline apically constrict in a coordinated way and invaginate as a tube (FOX AND PEIFER 2007). The invaginating cells then go on to become mesoderm, while the ectodermal cells close the gap and form a straight midline. In *abl*MZ mutants, apical constriction is not well coordinated, leaving some mesodermal cells on the surface. Ectodermal cells eventually close the gap, but the resulting midline is not straight (Fig.3D vs. E, blue arrows). Once again, Abl $\Delta$ IDR did not fully rescue these defects (Fig. 3F). This latter phenotype is particularly interesting as Abl $\Delta$ CR1 did rescue mesoderm invagination (ROGERS *et al.* 2016).

### **Abl $\Delta$ IDR does not rescue defects in germband retraction or dorsal closure**

The morphogenetic events in which Abl's roles have been analyzed in greatest detail are two of the final morphogenetic movements of embryogenesis: germband retraction and dorsal closure (GREVENGOED *et al.* 2001; ROGERS *et al.* 2016). These events are easily visualized by staining embryos with antibodies to E-cadherin (Ecad), which outlines cells. At the end of stage 11 of wildtype embryogenesis, the tail end of the embryo is curled up on the dorsal side. During stage 12, the germband retracts, ultimately positioning the tail end of the embryo at the posterior end of the egg, and thus leaving structures like the spiracles at the posterior end (Fig. 2A, arrow) and thus out of the dorsal view (Fig 4B). At this stage, the ventral and lateral side of the embryo are enclosed in epidermis, but the dorsal side is not—it is covered by a “temporary” tissue, the amnioserosa (AS, Fig. 4A). During dorsal closure, the epidermis and the amnioserosa work in parallel to completely enclose the embryo in epidermis (reviewed in (HAYES AND SOLON 2017; KIEHART *et al.* 2017) . Pulsatile apical constriction of the amnioserosal cells exerts force on the epidermis. In parallel, cells at the leading edge of the epidermis assemble a contractile actin cable, anchored cell-cell at leading edge tricellular junctions--this keeps the leading edge straight (LE, Fig. 4A,B blue arrows) and is important for zippering the epidermis together as the sheets meet at the canthi (Fig. 4A, B, red arrows). Actin based protrusions from leading edge cells also aid in cell matching/alignment between the two sheets. *abl*MZ mutants have defects in both germband retraction and dorsal closure (GREVENGOED *et al.* 2001; ROGERS *et al.* 2016). Germband retraction is not completed and the spiracles are thus positioned dorsally (Fig. 4C, green arrow). Dorsal closure proceeds very abnormally and often does not go to completion. The leading edge is highly wavy rather than straight (Fig. 4C, blue arrows)

and zippering at the two canthi is slowed (Fig. 4C, red arrows). Tissue tearing is often seen at the border between the leading edge and amnioserosa, exposing underlying tissue (Fig 4C, asterisk).

We thus asked whether these defects are rescued by Abl $\Delta$ IDR. The cuticle analysis above suggested the answer would be no, and that is what we observed. While occasional Abl $\Delta$ IDR; *abIMZ* embryos succeeded in proceeding through closure, even these exhibited defects in germband retraction, with the spiracles positioned dorsally (Fig. 4D, blue arrow). However, in most embryos closure was highly aberrant. The leading edge was wavy instead of straight (Fig. 4E,F vs. A,B, blue arrows). Zippering at the canthi was slowed (Fig. 4E,F red arrows) and often did not proceed uniformly, with zippering slower or absent at the anterior end (Fig. 4G, red arrows). As we observed in unrescued *abIMZ* mutants, tearing occurred between the leading edge and the amnioserosa (Fig. 4F, asterisk). In a subset of Abl $\Delta$ IDR; *abIMZ* embryos, the phenotype at stage 13/14 was even more severe. These embryos had a reduced epidermis, which exhibited deep, un-retracted segmental grooves (Fig. 4H,I, green arrows)—retention of deep segmental grooves during dorsal closure is another phenotype of *abIMZ* mutants (ROGERS *et al.* 2016). Some Abl $\Delta$ IDR; *abIMZ* embryos had numerous very large cells (Fig. 4J), which we suspect are a remnant of the multinucleate cells that arise during cellularization and gastrulation. This severe class of embryos likely represents the subset whose cuticles show substantial epithelial disruption (Fig. 2). Together, these data reveal that Abl $\Delta$ IDR fails to rescue defects in germband retraction or dorsal closure. Intriguingly, our previous analysis revealed that kinase activity and the FABD are largely dispensable for these morphogenetic events, while the CR1 PXXP motif in the linker plays a role (ROGERS *et al.* 2016).

### **Abl $\Delta$ IDR does not rescue defects leading edge cell shape or in actin regulation**

We next explored the role of the Abl IDR at the cellular and subcellular level. During dorsal closure the leading edge cells assemble a contractile actin cable that exerts tension along the leading edge. This cable maintains a straight leading edge and together with amnioserosal apical constriction elongates epidermal cells along the dorsal-ventral axis (reviewed in (HAYES AND SOLON 2017; KIEHART *et al.* 2017). The cable is anchored cell-cell at leading edge adherens junctions. In wildtype the tension is balanced among the cells and thus they exhibit relatively uniform shapes (Fig. 5A, arrows), with slight deviation at the segmental grooves (Fig. 5A, arrowheads). Loss of Abl disrupts leading edge cell shapes, with some cells hyper-constricted and other splayed open, presumably due to failure of the leading edge actin cable in some cells (GREVENGOED *et al.* 2001; ROGERS *et al.* 2016). We thus examined if Abl $\Delta$ IDR rescued these cell shape defects. It did not. Abl $\Delta$ IDR; ;

*abIMZ* embryos exhibited penetrant defects in leading edge cell shape, with splayed open and hyperconstricted cells (Fig. 5B,C magenta vs. yellow arrows). We also observed groups of cells that failed to elongate (Fig 5B,C, red asterisks), as we had previously observed in *abIMZ* mutants (GREVENGOED *et al.* 2001; ROGERS *et al.* 2016). Finally, most embryos exhibited another *abIMZ* mutant phenotype (GREVENGOED *et al.* 2001; GREVENGOED *et al.* 2003): large, presumably multinucleate cells, which in some embryos were quite frequent (Fig. 4D, yellow asterisks; the frequency of multinucleate cells appeared substantially higher than was seen in un-rescued *abIMZ* mutants). Cell shape defects and multinucleate cells were even observed in the occasional embryos which managed to close dorsally (Fig. 4E). Thus the Abl IDR is essential for regulation of leading edge cell shape.

One of the key roles of Abl family kinases is regulation of the cytoskeleton. *Drosophila* Abl regulates the actin cytoskeleton through effectors like the actin polymerase Enabled (Ena). Our previous analysis suggests an important role for Abl regulation of Ena and actin at the leading edge during dorsal closure (GREVENGOED *et al.* 2001; GATES *et al.* 2007; ROGERS *et al.* 2016). In wildtype, Ena localizes to the cell junctions of both amnioserosal and epidermal cells, but is strongly enriched in the tricellular junctions of leading edge cells, where the actin cable is anchored (Fig. 6A, red arrows; (GATES *et al.* 2007; MANNING *et al.* 2019). Ena is also somewhat enriched at tricellular junctions of more ventral epidermal cells (Fig. 6A, yellow arrows). In *abIMZ* mutants the even enrichment of Ena at leading edge tricellular junctions is lost (ROGERS *et al.* 2016). We thus asked whether Abl $\Delta$ IDR can restore leading edge Ena localization. While Ena remained enriched at some leading edge tricellular junctions of Abl $\Delta$ IDR; *abIMZ* mutants (Fig 6B,C,D red arrows), its uniform enrichment was lost, even though enrichment at lateral epidermal tricellular junctions remained (Fig 6B,C,D yellow arrows). At many leading edge tricellular junctions Ena was weak or absent (Fig 6B,C,D cyan arrows), and at other places Ena spread across the leading edge (Fig 6B,C,D green arrows), all features we previously observed in *abIMZ* mutants, or in embryos lacking the CR1 PXXP motif (ROGERS *et al.* 2016).

The altered cell shapes seen in *abIMZ* mutants reflect defects in the leading edge actin cable (ROGERS *et al.* 2016). In wildtype the actin cable extends relatively uniformly across the leading edge (Fig. 6E, arrows), joined cell to cell at leading edge tricellular junctions. In contrast, in Abl $\Delta$ IDR; *abIMZ* embryos, the leading edge actin cable was discontinuous, with gaps or regions of reduced intensity (Fig. 6F, green arrows) interspersed with regions of elevated actin intensity (Fig. 6F, cyan arrows), as we previously observed in *abIMZ* mutants (ROGERS *et al.* 2016). Actin levels were also elevated at many lateral epidermal tricellular junctions (Fig. 6F, yellow

arrows) a feature shared by *abIMZ* mutants (ROGERS *et al.* 2016) and by embryos in which Ena levels were artificially elevated (NOWOTARSKI *et al.* 2014). Thus Abl $\Delta$ IDR does not rescue the defects in Ena localization or actin regulation seen after loss of Abl.

### **Abl $\Delta$ IDR protein is more stable than WT Abl protein**

Perhaps the most surprising aspect of our phenotypic analysis of Abl $\Delta$ IDR were the indications that expression of this protein not only failed to rescue *abIMZ* mutants but in fact enhanced their phenotype. We first examined the possibility that this reflected destabilization of the protein or a change in subcellular localization. Wildtype Abl is found in a cytoplasmic pool and is enriched at the cell cortex—cortical enrichment is strong in early embryos and gradually reduces through the end of dorsal closure (GREVENGOED *et al.* 2001; GREVENGOED *et al.* 2003; FOX AND PEIFER 2007). Our previous analysis revealed that kinase activity and the FABD are dispensable for cortical localization, as are each of the four conserved motifs in the IDR (ROGERS *et al.* 2016). We thus asked if Abl $\Delta$ IDR retained the ability to localize to the cortex—we examined this in the background of *abIMZ* mutants to eliminate the possibility of cortical recruitment via interaction with the wildtype Abl protein. At the extended germband stage wildtype Abl is enriched at the cortex, and this is mimicked by our wildtype Abl:GFP protein (Fig. 7A; (FOX AND PEIFER 2007; ROGERS *et al.* 2016). Abl $\Delta$ IDR:GFP showed a similar degree of cortical enrichment at this stage (Fig. 7B,C). Both proteins retained some cortical enrichment during dorsal closure, though this was reduced relative to earlier in development (Fig. 7D,E). Thus Abl $\Delta$ IDR encodes an apparently stable protein that retained the ability to associate with the cortex. We were thus surprised when we visualized the Abl:GFP and Abl $\Delta$ IDR:GFP proteins live, without fixation. While cortical enrichment was still apparent for Abl:GFP (Fig. 7F), it was much less apparent for Abl $\Delta$ IDR:GFP (Fig. 7G)—instead, the entire cell appeared to be filled with protein.

These data suggested a second possibility: a difference in expression or accumulation levels. All of our transgenes were driven by the endogenous *abl* promoter, which we previously found leads to expression at normal levels (FOX AND PEIFER 2007) and in our second set of transgenes we targeted all to the same chromosomal location to reduce the possibility of position effects. Our wildtype GFP-tagged Abl and each of our previously analyzed mutants accumulate at levels similar to endogenous wildtype Abl (ROGERS *et al.* 2016). We thus repeated this analysis with Abl $\Delta$ IDR.

To our surprise, in embryos, Abl $\Delta$ IDR protein accumulates to substantially higher levels than that of wildtype GFP-tagged Abl (Fig. 8A); quantification suggested levels are elevated ~11-fold (Fig. 8B). This was not

solely a result of chromosomal position effect, as we observed similar elevation in protein levels with two independently generated Abl $\Delta$ IDR transgenics (flies carrying the P-element -mediated transgenes generated for our initial experiments and the phiC targeted transgenes). Because this result was so surprising, we tried expressing our transgenic proteins in a well-characterized *Drosophila* cultured cell line—S2 cells—driven by the heterologous metallothionein promoter. Strikingly, Abl $\Delta$ IDR protein also accumulated to a significantly higher level than wildtype Abl protein in transfected S2 cells (Fig 8C). This ruled out the possibility that the higher levels of Abl $\Delta$ IDR protein accumulation are solely due to differences in transcription, since in the embryos, transcription of both wildtype and Abl $\Delta$ IDR transgenes are driven by the same 2kb upstream *abl* promoter region, while in S2 cells, transcription of transgenes encoding wild type Abl and Abl $\Delta$ IDR was driven by the same metallothionein promoter and had essentially identical transfection efficiencies. Consistent with what we observed in live embryos, the enrichment of Abl:GFP in the S2 cell lamellipodium was obscured when we examined Abl $\Delta$ IDR, consistent with the possibility that its elevated levels saturated to normal binding sites in the lamellipodium and filled the cell. These data suggest that Abl $\Delta$ IDR protein is more stable and resistant to degradation than wildtype Abl, and that Abl's linker region contains an element important for regulating Abl protein levels.

## Discussion

The important roles of Abl kinase in embryonic development, the nervous system, adult homeostasis and oncogenesis make understanding its molecular function an important issue for both basic scientists and clinicians. Abl is a complex multidomain protein and we and others have assessed the roles of kinase activity and its many protein interaction domains. Here we further explore the roles of its intrinsically disordered linker (IDR), revealing it to be essential for protein function in *Drosophila* morphogenesis, and suggesting it plays an important role in regulating protein stability.

As one of the first protein kinases implicated in cancer, attention initially focused on Abl's kinase activity. This clearly is critical for function of the Bcr-Abl fusion protein found in chronic myeloid and acute lymphocytic leukemia, and drugs targeting kinase activity revolutionized treatment of these disorders (SAWYERS *et al.* 2002; TALPAZ *et al.* 2002). However, studies of Abl's normal roles in both *Drosophila* and in mammals suggest kinase activity, while important, is not essential, as proteins lacking kinase activity retain residual function in vivo (HENKEMEYER *et al.* 1990; MILLER *et al.* 2004; ROGERS *et al.* 2016). In a similar fashion, the C-terminal f-actin binding domain and other cytoskeletal interaction motifs serve important functions in some contexts, but are

not essential for protein function in others (MILLER *et al.* 2004; O'DONNELL AND BASHAW 2013; ROGERS *et al.* 2016; CHEONG AND VANBERKUM 2017).

Abl's IDR is an interesting but less well understood feature of Abl. IDRs are found in diverse proteins and have attracted increasing interest as regions mediating multivalent interactions, thus playing a role in some cases in phase transitions leading to the assembly of biomolecular condensates (BANANI *et al.* 2017; HOLEHOUSE AND PAPPU 2018). They contain regions of low-complexity sequence that are not well conserved, which mediate relatively non-specific interactions, and also, as in the case of Abl, can contain conserved motifs that serve as specific protein interaction motifs. Our previous analysis focused on four motifs that are well conserved among different insects, which we referred to as CR1 to CR4 (ROGERS *et al.* 2016). To our surprise, three of these, including a putative consensus binding site for the Abl effector Ena, are dispensable for rescuing viability and fertility (ROGERS *et al.* 2016). However, the PXXP motif embedded in CR1 proved important for function—Abl $\Delta$ CR1 mutants exhibited reduced adult and embryonic viability and had defects in most but not all aspects of Abl function during embryonic morphogenesis. Cheong and VanBerkum similarly found important functions of this motif in supporting adult viability and embryonic axon guidance (CHEONG AND VANBERKUM 2017). However, both groups data suggest that Abl $\Delta$ CR1 retains residual function. Cheong and VanBerkum carried this analysis further, deleting larger regions of the IDR, singly and in combination. These data further support the idea that the PXXP motif is the only individually essential region of the IDR, but their gain-of-function assays and analysis of protein localization suggest that the region containing the Ena-binding motif contributes to axon localization and subtly to function.

Here we cleanly deleted the IDR while leaving the FABD intact, allowing us to directly determine whether other regions of the linker have functions in addition to that of the PXXP motif. Our new data strongly support this idea. In our assays of embryonic morphogenetic events in which Abl has a known role, Abl $\Delta$ IDR provided no rescue of any, including two events, mesoderm invagination and maintenance of epidermal integrity, where Abl $\Delta$ CR1, lacking the PXXP motif, retained full or substantial function (ROGERS *et al.* 2016). Consistent with our data, Cheong and VanBerkum found that deleting the first quarter of the IDR had stronger effects than simply mutating the PXXP motif (CHEONG AND VANBERKUM 2017; CHEONG *et al.* 2020). Thus, loss of the IDR reduced Abl function more substantially than any of our other previous alterations, including simultaneously eliminating kinase activity and the FABD (ROGERS *et al.* 2016), demonstrating its critical role in Abl function.

In fact, we were surprised to see that in our assays of embryonic morphogenesis, attempting to rescue *abIMZ* mutants with *Abl* $\Delta$ IDR actually worsened their phenotype, substantially elevating the frequency of embryos with severe disruption of epidermal integrity. We similarly saw drastic disruption of epidermal integrity when we tried to use *Abl* $\Delta$ IDR to rescue the progeny of *abl<sup>f</sup>/Df* females. Our analyses here and our earlier work suggest that the disruption of epidermal integrity we observe is a consequence of the early defects in syncytial development and cellularization, leading to the formation of multinucleate cells. Other mutants that disrupt these processes in different ways, like that in the septin *peanut*, lead to a similarly disrupted cuticle phenotype (ADAM *et al.* 2000). Intriguingly, embryos maternally and zygotically mutant for the adapter protein Crk, which in mammals can bind the Abl PXXP motif (HOSSAIN *et al.* 2012; GREGOR *et al.* 2019), also have strong defects in syncytial development and cellularization, leading to strong disruption of epithelial integrity (SPRACKLEN *et al.* 2019), as we observed here. Intriguingly, Crk's role in actin regulation in the early *Drosophila* embryo involves regulating the cortical localization of the actin regulator SCAR (SPRACKLEN *et al.* 2019), and the PXXP motif in Abl can bind proteins in the WAVE regulatory complex (CHEONG *et al.* 2020), of which Scar is a part. Together these data support an important role for the IDR in mediating Abl's regulation of actin.

What accounts for these seemingly “dominant negative” effects of *Abl* $\Delta$ IDR? In our view, there are several possibilities, which are not mutually exclusive. First, it is possible that the allele we use as an *abl* null allele (FOX AND PEIFER 2007), *abl<sup>f</sup>*, actually encodes a very small amount of partially functional protein, via readthrough of the stop codon or a low level of downstream re-start. This could explain why the phenotype of the progeny of *Abl* $\Delta$ IDR; *abl<sup>f</sup>/Df* females is even worse than that of *Abl* $\Delta$ IDR; *abIMZ* mutants. In this scenario, *Abl* $\Delta$ IDR could interfere with the function of this residual Abl protein by forming inactive complexes with it or with some of its effectors or regulators. Consistent with this, Cheong and VanBerkum saw strong dominant enhancement of mutants lacking the axon guidance modulators Frazzled and Slit when they overexpressed an Abl mutant lacking the first quarter of the IDR (CHEONG AND VANBERKUM 2017). It also is possible that the Deficiency we used, *Df(3L)st-7 Ki*, also deletes a gene that enhances the *abl* null phenotype, as there are many known genes with this phenotype (e.g., (GERTLER *et al.* 1989; GERTLER *et al.* 1990; FORSTHOEFEL *et al.* 2005).

The *Abl* $\Delta$ IDR protein has an additional property that may help explain these dominant negative effects and also casts light on the regulation of Abl activity: it accumulates at levels substantially higher than wildtype Abl. We observed this effect with two different transgenes driven by the endogenous *abl* promoter inserted at



different chromosomal locations, and, importantly, also observed it when we expressed Abl $\Delta$ IDR in cultured *Drosophila* cells driven by a heterologous promoter. These data support the idea that the IDR contains sequences that regulate Abl stability. None of our previous deletions of conserved motifs within the IDR (CR1-CR4) affected protein stability (ROGERS *et al.* 2016), nor did the larger deletions of portions of the IDR made by Cheong and VanBerkum (CHEONG AND VANBERKUM 2017) suggesting this effect either involves a different region of the IDR or it is a property of the IDR as a whole. It will be interesting to determine whether this is a conserved property of the IDR across the Abl family, and by what mechanism this occurs. Mammalian Abl is regulated by the ubiquitin-proteasome system (ECHARRI AND PENDERGAST 2001) and Abl can be ubiquitinated by the E3 ligase Cbl (SOUBEYRAN *et al.* 2003). Mammalian Arg can be ubiquitinated in response to oxidative stress (CAO *et al.* 2005). It is tempting to speculate that the IDR may play a role in ubiquitin-mediated protein turnover as a mechanism for normally regulating Abl activity, but at the moment this remains totally speculative.

#### **Author contributions**

E.M. Rogers and M. Peifer designed the project, E.M. Rogers and S.C. Allred carried out the experiments, E.M. Rogers and M. Peifer analyzed the data and wrote the manuscript with input from S.C. Allred.

#### **Acknowledgements**

We are grateful to John Poulton for statistical advice, and to Kia Perez-Vale for advice on quantifying immunoblots. We thank the Developmental Studies Hybridoma Bank and the Bloomington *Drosophila* Stock Center for reagents and our lab members for thoughtful conversations. This work was supported by National Institutes of Health Grants R01 GM47957 and R35 GM118096 to M.P., and E.M.R was supported by a Leukemia and Lymphoma Society Career Development Program Fellowship Grant 5339-08.

## Materials and Methods

### Transgenic Fly Lines

To create the Abl $\Delta$ IDR transgene, a pair of overlapping PCR products were generated with Phusion high fidelity DNA polymerase (NEB) using pUAS-Abl:GFP (FOX AND PEIFER 2007) as a template. pUAS-Abl:GFP contains 2kb of 5' upstream promoter from the endogenous *abl* gene as well as an in frame eGFP tag. The  $\Delta$ IDR deletion was introduced by mutagenic DNA oligonucleotide primers in the overlapping section of the PCR products. In addition, a 25 amino acid flexible linker (GGG)<sub>5</sub> was added at the location of the deletion to promote proper folding of the adjacent structured regions. The two overlapping PCR products were joined by PCR stitching and cloned into the Xba/Not fragment of pUASg-Abl:GFP to make pUASg-Abl $\Delta$ IDR:GFP. The primers used for mutagenesis were as follows :

Abl $\Delta$ IDR Forward:

5'GGTGGATCCGGTGGATCAGGTGGATCCGGTGGTAGTGGTGGATCC**GCCACGCCTATTGCCAAACTGA**  
**CCGAA3'**

Abl $\Delta$ IDR Reverse:

5'GGATCCACCACTACCACCGGATCCACCTGATCCACCGGATCCACCG**GCTCCTCCGCCGGTGGCCACGCC**  
**CGA3'**

Italicized regions contain the code for the 25 aa flexible linker and the bold regions are complementary to the *abl* sequence. The pUASg-Abl $\Delta$ IDR:GFP transgene was inserted via P-element transposition, and we were able obtain multiple independent lines, including on the 2<sup>nd</sup> chromosome. To make the targeted  $\Delta$ IDR transgene, the insert was excised from pUASg-Abl $\Delta$ IDR:GFP with Xba1 and Not1 and ligated into pUAS<sub>attP</sub> to make pUAS<sub>attP</sub>-Abl $\Delta$ IDR:GFP. The targeted transgene was targeted to the left arm of the 2nd chromosome by phiC31 integrase-mediated transgenesis into PBac{yellow[+]-attP-3B}VK00037 (cytogenetic map position: 22A3; (BISCHOF *et al.* 2007). Injections of transgenic constructs were performed by BestGene Inc.

### Genotyping assays

Fly genomic DNA was prepared as follows: 1-5 flies were frozen overnight at -20°C and then crushed with a barrier tip in 50 $\mu$ l 1X Squishing Buffer (10 mM Tris pH 8.2, 1mM EDTA, 25mM NaCl) plus 1 $\mu$ l Proteinase K(10mg/ml), incubated at 37°C for 30-60 min, and heat inactivated for 1-2 min at 95°C. Genomic DNA was

used as a template for PCR. For Suppl. Fig. 1C and Suppl. Fig. 3, PCR was done using two primers that flank the first intron of *Drosophila abl* (F: 5'-CCTGGTCCGTGAAA GTGAAA-3', R 5'-GGATCCTCTGAGATGCGGTA-3'). PCR products were resolved on a 3.5% NuSieve GTG agarose gel in 1X TBE. Wild type endogenous *abl* yields a 166bp fragment, the *abl<sup>Δ</sup>* mutant yields a 133bp fragment, and the *abl* Transgenes yield a 93bp fragment due to absence of an intron.

### **Fly Stocks, viability and phenotypic analysis of *abl* mutants and statistical tests**

All experiments were done at 25°C unless noted. *y w* served as wildtype in our experiments. For assessing rescue of adult viability, we generated zygotic *abl* mutants by crossing *Df(3L)st-7 Ki/TM3 Sb* females to *transgene/transgene; abl<sup>Δ</sup>/TM3 Sb* males, and selecting for *Ki* and against *Sb* (*abl<sup>Δ</sup>/Df(3L)st-7 Ki*). We set the fraction of progeny with this genotype seen when using the wildtype *abl* transgene (*AblWT*; 27%) as 100%, and other genotypes were normalized to this. Adult viabilities were compared by Fisher's Exact test (GraphPad). We used two methods to generate embryos maternally and zygotically *abl* mutant (*ablMZ*): 1) using the dominant female sterile method (Chou and Perrimon, 1996) to make *abl<sup>Δ</sup>* clones in the female germline and 2) using a deficiency spanning the *abl* locus transheterozygous to *abl<sup>Δ</sup>*. To generate *abl* germline clones, *w;Tn[Abl]/Tn[Abl];FRT 79 D-F abl<sup>Δ</sup>/ TM3* females were crossed with *hs::Flp;;FRT 79 D-F ovoD/TM3* males. 48-72 hr old progeny were heat shocked for three hours at 37° C and allowed to develop to adulthood. Virgin female progeny of the genotype *hs::FLP/+;Tn[Abl]/+; FRT 79 D-F abl<sup>Δ</sup>/ FRT 79 D-F ovoD* were crossed with *w; Tn[Abl]/Tn[Abl];FRT 79 D-F abl<sup>Δ</sup>/ TM3, twi-GAL4,UAS-EGFP* males, embryos collected from cups with apple juice/agar plates and yeast paste. As one approach, we generated embryos maternally and zygotically mutant for *abl* using a deficiency: *Df(3L) st-j7, Ki/ TM6b* (Bloomington #5416, Deletions73A2-73B2). For generation of *ablMZ* mutants by this approach *w; Df(3L) st-j7, Ki/ TM3, twi-GAL4,UAS-EGFP* females were crossed with *w;Tn[Abl]/Tn[Abl];FRT 79 D-F abl<sup>Δ</sup>/ TM3* males. The resulting *w;Tn[Abl]/+;FRT 79 D-F abl<sup>Δ</sup>/ Df(3L) st-j7, Ki* females were crossed to *w;Tn[Abl]/Tn[Abl];FRT 79 D-F abl<sup>Δ</sup>/ TM3, twi-GAL4,UAS-EGFP* males and embryos collected. Assessment of embryonic lethality and preparation of embryonic cuticles were done as in Wieschaus and Nüsslein-Volhard (1986) (WIESCHAUS AND NÜSSLEIN-VOLHARD 1986). For both approaches, embryonic viabilities were compared by Fisher's Exact test (GraphPad). To compare cuticle phenotypes of *abl<sup>Δ</sup>MZ* mutants and embryos expressing different *Abl* transgenes in the *abl<sup>Δ</sup>MZ* mutant background, we used Fisher's Exact test (GraphPad). For each genotype, the number of cuticles falling into the two more severe classes (i.e. Dorsal closure failure, and Epidermal integrity defect) were grouped to a single defective category,

and compared to the number of cuticles in the two less severe categories (wildtype and Strong defects in germband retraction). Similarly, cuticle scores of each mutant transgene in the *abl*<sup>4</sup> mutant background were compared to the wildtype transgene (Abl<sup>WT</sup>) using the same approach.

### **Embryo live imaging**

Embryos from flies that homozygous for either the transgene encoding Abl<sup>WT</sup> or Abl<sup>ΔIDR</sup> were dechorionated in 50% bleach and mounted in halocarbon oil (series 700; Halocarbon Products, River Edge, NJ) between a gas-permeable membrane (Petriperm; Sartorius, Edgewood, NJ) and a glass coverslip and imaged in a Z-series of 1 $\mu$ M slices on a Zeiss LSM-5 Pascal confocal microscope.

### **Immunofluorescence**

To examine embryos by immunofluorescence, flies were allowed to lay eggs on apple juice/agar plates with yeast paste for times calculated to obtain embryos at the right stages. Embryos were collected, dechorionated in 50% bleach, washed in 0.1% Triton-X, and fixed in 1:1 Heptane/3.7% Formaldehyde diluted in PBS for 20 minutes at room temperature. Embryos were then devitellinized by shaking in 1:1 heptane/methanol, when prepared for phalloidin staining, hand- devitellinized. Embryos were then blocked in Blocking Solution (PBS/0.1% Triton-X/1% Normal Goat Serum) for  $\geq$  30 min, incubated in primary antibody diluted in Blocking Solution overnight at 4°C and washed 3X in Blocking Solution. Embryos were then incubated in secondary antibody in Blocking Solution for 2 hours at room temperature and washed 3X in Blocking Solution. Embryos were mounted on glass slides in Aquapolymount (Polysciences, Inc). Primary and secondary antibodies were: (anti-Dcad, 1:100; anti-Enabled, 1:500 (all from the Developmental Studies Hybridoma Bank and anti-mouse and anti-rat IgG Alexa Fluors 568 and 647, from Molecular Probes); some secondary antibodies were preabsorbed with fixed *y w* embryos. For F-actin staining TRITC labeled phalloidin (Sigma) was used at a dilution of 1:500 to 1:1000.

For S2 cells, resuspended cells were allowed to attach for 1 hour onto a ConcanavalinA coated glass coverslip. Cells were then fixed 10 minutes in 10% formaldehyde HL3 buffer (70 mM NaCl; 5 mM KCl; 1.5 mM CaCl<sub>2</sub>-2H<sub>2</sub>O; 20 mM; MgCl<sub>2</sub>-6H<sub>2</sub>O; 10 mM NaHCO<sub>3</sub>; 5 mM trehalose; 115 mM sucrose; 5 mM HEPES; pH 7.2) followed by four 10 minute washes in PBS with 0.1% Triton-X (PBST) and two brief washes with ddH<sub>2</sub>O. During the last PBST wash, TRITC, labeled phalloidin was added to a dilution of 1:1000. A drop of Aquapolymount was added to the coverslips, and the coverslips were mounted on pedestals of dried nail polish on a glass slide, and sealed with nail polish. Imaging of embryos and S2 cells was done on a Zeiss LSM-5 Pascal or Zeiss 710

scanning confocal microscopes. Images were processed using ZEN 2009 software. Photoshop CS6 (Adobe) was used to adjust input levels so that the signal spanned the entire output grayscale and to adjust brightness and contrast.

### **Immunoblotting**

Embryonic extracts for immunoblotting were prepared by resuspending embryos in an equal volume of 2X SDS-PAGE Sample buffer(100 mM Tris-Cl (pH 6.8);4% SDS; 0.2% bromophenol blue; 20% glycerol; 200 mM B-mercaptoethanol) and homogenizing with a pestle in a microfuge tube. To make S2 cell extracts 1mL of resuspended S2 cells were spun down in a microfuge tube, the media was removed, and the pellet resuspended in an equal volume of 2X SDS PAGE Sample buffer. The samples were boiled for 5 min, spun to clear debris, and 10 ul of the resulting extract run on a 7.5% SDS-PAGE gel, and transferred to a nitrocellulose membrane. To detect the transgenic GFP-tagged Abl proteins we used anti-GFP (JL-8, 1:500 or 1:1000, Clontech). Anti- $\alpha$ Tubulin (Sigma, 1:10000) or anti-Pnut (Developmental studies Hybridoma Bank,1:30) were used as loading controls. Detection was done using HRP-conjugated anti-mouse IgG secondary antibody (Pierce, 1:50000), and the ECL plus substrate kit (Pierce).

### **Quantification of Abl $\Delta$ IDR and Abl WT protein levels**

Four immunoblots of embryo extracts from homozygous stocks of the targeted Abl WT and Abl  $\Delta$ IDR transgenes were used to quantify relative levels of Abl WT and Abl  $\Delta$ IDR proteins in the embryos. Scans of Western blot film exposures were opened and converted to grayscale images in Adobe Photoshop. The resulting image was opened in ImageJ as a JPEG and the pixels were inverted. Rectangular ROIs of the exact same dimensions, and just large enough to contain the thickest band were drawn around the Abl protein and loading control bands. An ROI was also drawn around an unexposed area of the film for background subtraction. The mean gray value (MGV) of the ROIs for Abl and loading control proteins, and background were determined. The background subtracted MGVs of the Abl $\Delta$ IDR and Abl WT bands were adjusted for any loading differences by dividing them by the MGVs of their background subtracted loading controls. The background and loading control adjusted Abl $\Delta$ IDR and Abl WT levels were expressed as a ratio of Abl $\Delta$ IDR/Abl WT, normalized to the level of Abl WT which was assigned a value of 1. To determine statistical significance an unpaired t-test was used (GraphPad).

### **Expression of Abl proteins in S2 cells**

To express Abl and Abl  $\Delta$ IDR proteins in S2 cells, the Abl and Abl  $\Delta$ IDR coding regions were cloned by

Gateway Technology(Invitrogen) into pMT, a vector for metal inducible protein synthesis via the metallothionein promoter. To make pMT Abl::GFP and pMT Abl $\Delta$ IDR::GFP, Phusion Polymerase was used to amplify the Abl and Abl  $\Delta$ IDR coding regions using pUAS $\Delta$ attP-Abl:GFP and pUAS $\Delta$ attP-Abl $\Delta$ IDR:GFP as a template with the following primers:

AblGFP Gateway Forward:

5'CACCATGGGGGCTCAGCAGGGCAA 3'

AblGFP Gateway Reverse:

5'CCTGTTAAGCGCATTGGAGATCTGA3'

pMT Abl or pMT Abl $\Delta$ IDR::GFP DNAs were transfected into S2 cells grown in Sf-900 II SFM medium (Invitrogen) in the wells of 6 well plates (35mm) using Effectene transfection reagent(Qiagen) according to the manufacturer instructions. Six hours after the transfection, CuSO<sub>4</sub> was added to 500  $\mu$ M to induce expression of the transgenes. Cells were allowed to induce for 24 hrs and were used for both Western Blots and Immunofluorescence microscopy. Transfection efficiency was estimated by counting GFP positive cells on a dozen 143 $\mu$ m X 143 $\mu$ m fields on slides for immunofluorescence and dividing by the total number of cell (for blot in Fig 7c transfection efficiency: Abl WT= 65%(n=205) and Abl $\Delta$ IDR=57%(n=109)

## References

- Adam, J. C., J. R. Pringle and M. Peifer, 2000 Evidence for functional differentiation among *Drosophila* septins in cytokinesis and cellularization. *Molecular Biology of the Cell* 11: 3123-3135.
- Banani, S. F., H. O. Lee, A. A. Hyman and M. K. Rosen, 2017 Biomolecular condensates: organizers of cellular biochemistry. *Nat Rev Mol Cell Biol* 18: 285-298.
- Bischof, J., R. K. Maeda, M. Hediger, F. Karch and K. Basler, 2007 An optimized transgenesis system for *Drosophila* using germ-line-specific phiC31 integrases. *Proc Natl Acad Sci U S A* 104: 3312-3317.
- Bradley, W. D., and A. J. Koleske, 2009 Regulation of cell migration and morphogenesis by Abl-family kinases: emerging mechanisms and physiological contexts. *Journal of Cell Science* 122: 3441-3454.
- Cao, C., Y. Li, Y. Leng, P. Li, Q. Ma *et al.*, 2005 Ubiquitination and degradation of the Arg tyrosine kinase is regulated by oxidative stress. *Oncogene* 24: 2433-2440.
- Cheong, H. S. J., M. Nona, S. B. Guerra and M. F. VanBerkum, 2020 The first quarter of the C-terminal domain of Abelson regulates the WAVE regulatory complex and Enabled in axon guidance. *Neural Dev* 15: 7.
- Cheong, H. S. J., and M. F. A. VanBerkum, 2017 Long disordered regions of the C-terminal domain of Abelson tyrosine kinase have specific and additive functions in regulation and axon localization. *PLoS One* 12: e0189338.
- Chislock, E. M., and A. M. Pendergast, 2013 Abl family kinases regulate endothelial barrier function in vitro and in mice. *PLoS One* 8: e85231.
- Chislock, E. M., C. Ring and A. M. Pendergast, 2013 Abl kinases are required for vascular function, Tie2 expression, and angiopoietin-1-mediated survival. *Proc Natl Acad Sci U S A* 110: 12432-12437.
- Chou, T.-B., E. Noll and N. Perrimon, 1993 Autosomal P[ovo<sup>D1</sup>] dominant female-sterile insertions in *Drosophila* and their use in generating female germ-line chimeras. *Development* 119: 1359-1369.
- Colicelli, J., 2010 ABL tyrosine kinases: evolution of function, regulation, and specificity. *Sci Signal* 3: re6.
- Courtemanche, N., S. M. Gifford, M. A. Simpson, T. D. Pollard and A. J. Koleske, 2015 Abl2/Abl-related gene stabilizes actin filaments, stimulates actin branching by actin-related protein 2/3 complex, and promotes actin filament severing by cofilin. *J Biol Chem* 290: 4038-4046.
- Echarri, A., and A. M. Pendergast, 2001 Activated c-Abl is degraded by the ubiquitin-dependent proteasome pathway. *Curr Biol* 11: 1759-1765.
- Forsthoefel, D. J., E. C. Liebl, P. A. Kolodziej and M. A. Seeger, 2005 The Abelson tyrosine kinase, the Trio GEF and Enabled interact with the Netrin receptor Frazzled in *Drosophila*. *Development* 132: 1983-1994.
- Fox, D. T., and M. Peifer, 2007 Abelson kinase (Abl) and RhoGEF2 regulate actin organization during cell constriction in *Drosophila*. *Development* 134: 567-578.

- Gates, J., J. P. Mahaffey, S. L. Rogers, M. Emerson, E. M. Rogers *et al.*, 2007 Enabled plays key roles in embryonic epithelial morphogenesis in *Drosophila*. *Development* 134: 2027-2039.
- Gertler, F., R. Bennett, M. Clark and F. Hoffmann, 1989 *Drosophila* abl tyrosine kinase in embryonic CNS axons: a role in axonogenesis is revealed through dosage-sensitive interactions with disabled. *Cell* 58: 103-113.
- Gertler, F. B., J. S. Doctor and F. M. Hoffmann, 1990 Genetic suppression of mutations in the *Drosophila* abl proto-oncogene homolog. *Science* 248: 857-860.
- Gregor, T., M. K. Bosakova, A. Nita, S. P. Abraham, B. Fafilek *et al.*, 2019 Elucidation of protein interactions necessary for the maintenance of the BCR-ABL signaling complex. *Cell Mol Life Sci*.
- Grevengoed, E. E., D. T. Fox, J. Gates and M. Peifer, 2003 Balancing different types of actin polymerization at distinct sites: roles for Abelson kinase and Enabled. *J. Cell Biol.* 163: 1267-1279.
- Grevengoed, E. E., J. J. Loureiro, T. L. Jesse and M. Peifer, 2001 Abelson kinase regulates epithelial morphogenesis in *Drosophila*. *J Cell Biol* 155: 1185-1198.
- Gu, J. J., N. Zhang, Y. W. He, A. J. Koleske and A. M. Pendergast, 2007 Defective T cell development and function in the absence of Abelson kinases. *J Immunol* 179: 7334-7343.
- Hardin, J. D., S. Boast, P. L. Schwartzberg, G. Lee, F. W. Alt *et al.*, 1995 Bone marrow B lymphocyte development in c-abl-deficient mice. *Cell Immunol* 165: 44-54.
- Hardin, J. D., S. Boast, P. L. Schwartzberg, G. Lee, F. W. Alt *et al.*, 1996 Abnormal peripheral lymphocyte function in c-abl mutant mice. *Cell Immunol* 172: 100-107.
- Hayes, P., and J. Solon, 2017 *Drosophila* dorsal closure: An orchestra of forces to zip shut the embryo. *Mech Dev* 144: 2-10.
- Henkemeyer, M., F. Gertler, W. Goodman and F. Hoffmann, 1987 The *Drosophila* Abelson proto-oncogene homolog: identification of mutant alleles that have pleiotropic effects late in development. *Cell* 51: 821-828.
- Henkemeyer, M., S. West, F. Gertler and F. Hoffmann, 1990 A novel tyrosine kinase-independent function of *Drosophila* abl correlates with proper subcellular localization. *Cell* 63: 949-960.
- Holehouse, A. S., and R. V. Pappu, 2018 Functional Implications of Intracellular Phase Transitions. *Biochemistry* 57: 2415-2423.
- Hossain, S., P. M. Dubielecka, A. F. Sikorski, R. B. Birge and L. Kotula, 2012 Crk and ABI1: binary molecular switches that regulate abl tyrosine kinase and signaling to the cytoskeleton. *Genes Cancer* 3: 402-413.
- Huang, Y., E. O. Comiskey, R. S. Dupree, S. Li, A. J. Koleske *et al.*, 2008 The c-Abl tyrosine kinase regulates actin remodeling at the immune synapse. *Blood* 112: 111-119.
- Kannan, R., and E. Giniger, 2017 New perspectives on the roles of Abl tyrosine kinase in axon patterning. *Fly (Austin)* 11: 260-270.
- Khatri, A., J. Wang and A. M. Pendergast, 2016 Multifunctional Abl kinases in health and disease. *J Cell Sci* 129: 9-16.



- Kiehart, D. P., J. M. Crawford, A. Aristotelous, S. Venakides and G. S. Edwards, 2017 Cell Sheet Morphogenesis: Dorsal Closure in *Drosophila melanogaster* as a Model System. *Annu Rev Cell Dev Biol* 33: 169-202.
- Koleske, A. J., A. M. Gifford, M. L. Scott, M. Nee, R. T. Bronson *et al.*, 1998 Essential roles for the Abl and Arg tyrosine kinases in neurulation. *Neuron* 21: 1259-1272.
- Lee, J. K., P. T. Hallock and S. J. Burden, 2017 Abelson tyrosine-protein kinase 2 regulates myoblast proliferation and controls muscle fiber length. *Elife* 6.
- Li, B., S. Boast, K. de los Santos, I. Schieren, M. Quiroz *et al.*, 2000 Mice deficient in Abl are osteoporotic and have defects in osteoblast maturation. *Nat Genet* 24: 304-308.
- Li, P., S. Banjade, H. C. Cheng, S. Kim, B. Chen *et al.*, 2012 Phase transitions in the assembly of multivalent signalling proteins. *Nature* 483: 336-340.
- Lin, Y. C., M. F. Yeckel and A. J. Koleske, 2013 Abl2/Arg controls dendritic spine and dendrite arbor stability via distinct cytoskeletal control pathways. *J Neurosci* 33: 1846-1857.
- Manning, L. A., K. Z. Perez-Vale, K. N. Schaefer, M. T. Sewell and M. Peifer, 2019 The *Drosophila* Afadin and ZO-1 homologues Canoe and Polychaetoid act in parallel to maintain epithelial integrity when challenged by adherens junction remodeling. *Mol Biol Cell* 30: 1938-1960.
- Miller, A. L., Y. Wang, M. S. Mooseker and A. J. Koleske, 2004 The Abl-related gene (Arg) requires its F-actin-microtubule cross-linking activity to regulate lamellipodial dynamics during fibroblast adhesion. *J Cell Biol* 165: 407-419.
- Moresco, E. M., S. Donaldson, A. Williamson and A. J. Koleske, 2005 Integrin-mediated dendrite branch maintenance requires Abelson (Abl) family kinases. *J Neurosci* 25: 6105-6118.
- Moresco, E. M., and A. J. Koleske, 2003 Regulation of neuronal morphogenesis and synaptic function by Abl family kinases. *Curr Opin Neurobiol* 13: 535-544.
- Nowotarski, S. H., N. McKeon, R. J. Moser and M. Peifer, 2014 The actin regulators Enabled and Diaphanous direct distinct protrusive behaviors in different tissues during *Drosophila* development. *Mol Biol Cell* 25: 3147-3165.
- O'Donnell, M. P., and G. J. Bashaw, 2013 Distinct functional domains of the Abelson tyrosine kinase control axon guidance responses to Netrin and Slit to regulate the assembly of neural circuits. *Development* 140: 2724-2733.
- Qiu, Z., Y. Cang and S. P. Goff, 2010a Abl family tyrosine kinases are essential for basement membrane integrity and cortical lamination in the cerebellum. *J Neurosci* 30: 14430-14439.
- Qiu, Z., Y. Cang and S. P. Goff, 2010b c-Abl tyrosine kinase regulates cardiac growth and development. *Proc Natl Acad Sci U S A* 107: 1136-1141.
- Ren, R., 2005 Mechanisms of BCR-ABL in the pathogenesis of chronic myelogenous leukaemia. *Nat Rev Cancer* 5: 172-183.
- Rogers, E. M., A. J. Spracklen, C. G. Bilancia, K. D. Sumigray, S. C. Allred *et al.*, 2016 Abelson kinase acts as a robust, multifunctional scaffold in regulating embryonic morphogenesis. *Mol Biol Cell* 27: 2613-2631.
- Sawyers, C. L., A. Hochhaus, E. Feldman, J. M. Goldman, C. B. Miller *et al.*, 2002 Imatinib induces hematologic and cytogenetic responses in patients with chronic myelogenous leukemia in myeloid blast crisis: results of a phase II study. *Blood* 99: 3530-3539.

- Schwartzberg, P. L., E. J. Robertson and S. P. Goff, 1991 A Substitution Mutation in the C-Abl Gene Introduced into the Murine Germ Line by Targeted Gene Disruption in Embryonic Stem-Cells. *Human Gene Transfer* 219: 217-226.
- Soubeyran, P., A. Barac, I. Szymkiewicz and I. Dikic, 2003 Cbl-ArgBP2 complex mediates ubiquitination and degradation of c-Abl. *Biochem J* 370: 29-34.
- Spracklen, A. J., E. M. Thornton-Kolbe, A. N. Bonner, A. Florea, P. J. Compton *et al.*, 2019 The Crk adapter protein is essential for *Drosophila* embryogenesis, where it regulates multiple actin-dependent morphogenic events. *Mol Biol Cell* 30: 2399-2421.
- Talpaz, M., R. T. Silver, B. J. Druker, J. M. Goldman, C. Gambacorti-Passerini *et al.*, 2002 Imatinib induces durable hematologic and cytogenetic responses in patients with accelerated phase chronic myeloid leukemia: results of a phase 2 study. *Blood* 99: 1928-1937.
- Tamada, M., D. L. Farrell and J. A. Zallen, 2012 Abl regulates planar polarized junctional dynamics through beta-catenin tyrosine phosphorylation. *Dev Cell* 22: 309-319.
- Tybulewicz, V. L. J., C. E. Crawford, P. K. Jackson, R. T. Bronson and R. C. Mulligan, 1991 Neonatal Lethality and Lymphopenia in Mice with a Homozygous Disruption of the C-Abl Protooncogene. *Cell* 65: 1153-1163.
- Wieschaus, E., and C. Nüsslein-Volhard, 1986 Looking at embryos, pp. 199-228 in *Drosophila, A Practical Approach*, edited by D. B. Roberts. IRL Press, Oxford, England.
- Zipfel, P. A., W. Zhang, M. Quiroz and A. M. Pendergast, 2004 Requirement for Abl kinases in T cell receptor signaling. *Curr Biol* 14: 1222-1231.

**Table 1**

| Construct    | Residues changed or deleted | Percent rescue of adult viability in <i>abl<sup>4</sup>/Df(3L)st-j7</i> (normalized to WT) | Percent rescue of progeny embryonic viability of <i>abl<sup>4</sup>/Df(3L)st-j7 X abl<sup>4</sup>/+</i> | Probabability that rescue is worse than that by Abl WT | Percent rescue of progeny embryonic viability of <i>abl<sup>4</sup> maternal germ line clone X abl4/+</i> | Probabability that lethality is worse than that of Abl WT | Probabability that lethality is better or worse than that of <i>ablMZ</i> |
|--------------|-----------------------------|--------------------------------------------------------------------------------------------|---------------------------------------------------------------------------------------------------------|--------------------------------------------------------|-----------------------------------------------------------------------------------------------------------|-----------------------------------------------------------|---------------------------------------------------------------------------|
| No Transgene | N/A                         | 20.4 (n=145)                                                                               | N/A                                                                                                     | N/A                                                    | 8.2% (n=527) #                                                                                            | p<0.0001                                                  | n/a                                                                       |
| Abl WT       | N/A                         | 100% (n=386)                                                                               | 89.4 (n=901) #                                                                                          | N/A                                                    | 38.9% (n=540) #                                                                                           | n/a                                                       | p<0.0001                                                                  |
| AblΔLinker   | 679-1398                    | 48.1% (n=223)                                                                              | 26.2% (n=378)                                                                                           | p<0.0001                                               | 1.1% (n=569)                                                                                              | p<0.0001                                                  | p<0.0001                                                                  |
| AblΔFABD     | 1418-1520                   | 140% (n=173)                                                                               | 97.1 (n=362) #                                                                                          | N.S.                                                   | 34.6% (n=515) #                                                                                           | p=0.16                                                    | p<0.0001                                                                  |
| AblKDΔFABD   | K417N,1418-1520             | 81.5% (n=170)                                                                              | 52.1 (n=259) #                                                                                          | p<0.0001                                               | 28.2 (n=560) #                                                                                            | p=0.0002                                                  | p<0.0001                                                                  |
| AblΔCR1      | 734-789                     | 30.7% (n=48)                                                                               | 53.9 (n=267) #                                                                                          | p<0.0001                                               | 12.4% (n=606) #                                                                                           | p<0.0001                                                  | p=0.02                                                                    |

n=number of adults/embryos scored; N/A=not applicable; NS=not significant

# Data from Rogers et al. 2016 for comparison

## Figure legends

Figure 1. Generating Abl $\Delta$ IDR and testing its ability to rescue adult and embryonic viability. A. Diagram of human Abl and Arg and Drosophila Abl, showing conserved domains/motifs as well as motifs in the IDR that vary between family members. B. Illustration of the mutant Abl proteins we previously tested and our new Abl $\Delta$ IDR mutant. It was designed to remove essentially the entire IDR, leaving only a few amino acids at each end to ensure we did not disrupt folding of the kinase domain or FABD. A 25 aa flexible linker was added in its place. C. Assessment of the ability of Abl $\Delta$ IDR to rescue the viability of *abl<sup>4</sup>/DfAbl* adults, normalized to rescue by our wildtype Abl transgene, and compared to rescue by some of our previously tested mutants. Full data sets for C-E are in Table 1. D. Assessment of the ability of Abl $\Delta$ IDR to rescue embryonic viability of the progeny of *abl<sup>4</sup>/DfAbl* females mated to *abl<sup>4</sup>/+* males, compared to rescue by some of our previously tested mutants. E. Assessment of the ability of Abl $\Delta$ IDR to rescue embryonic viability of the progeny females with germlines homozygous for *abl<sup>4</sup>* mated to *abl<sup>4</sup>/+* males, compared to rescue by some of our previously tested mutants. Line indicates degree of rescue by our wildtype Abl transgene.

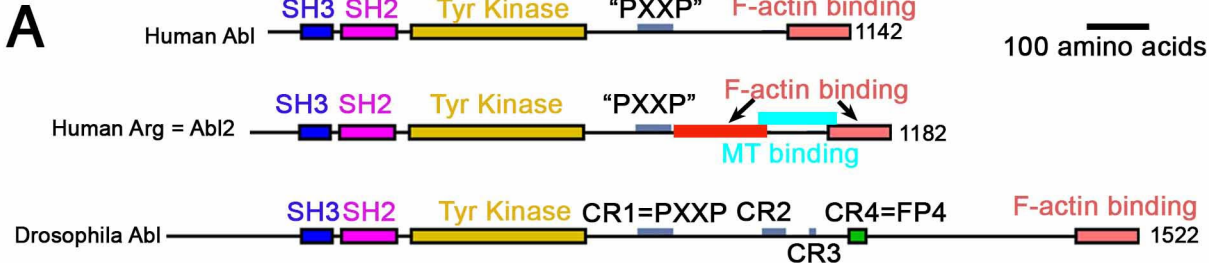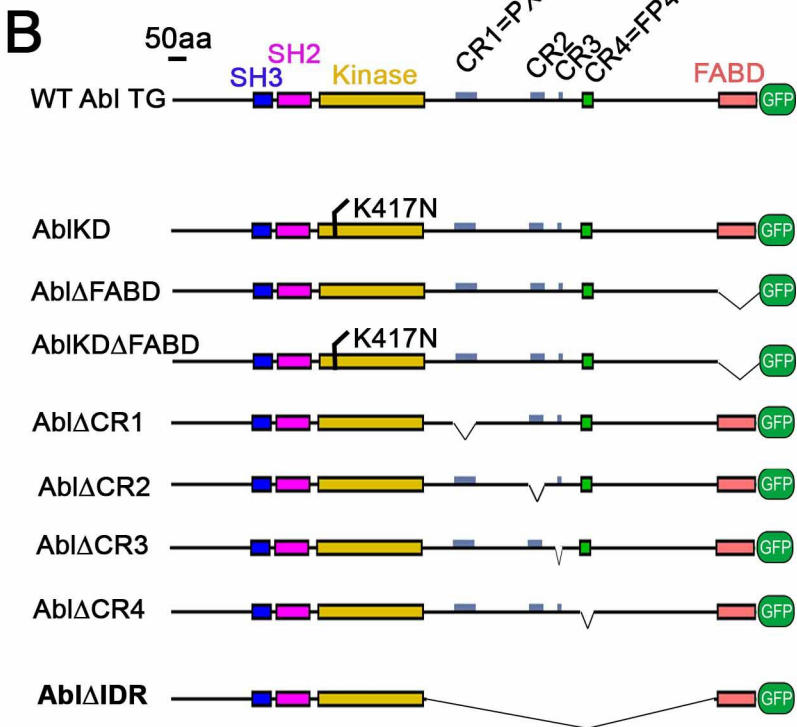

**C**

Rescue of adult viability of *abl<sup>1</sup>/Df(3L)st-j7*  
n ≥ 48 animals/genotype

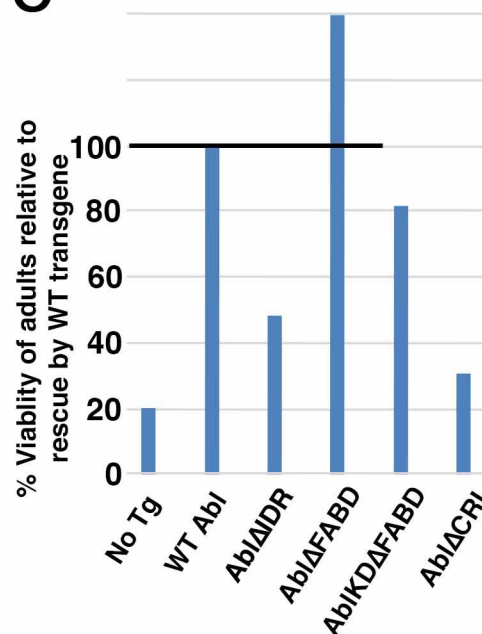

**D**

Rescue of progeny embryonic viability of *abl<sup>1</sup>/Df(3L)st-j7*  
*x abl<sup>1</sup>/+*  
n ≥ 259 animals/genotype

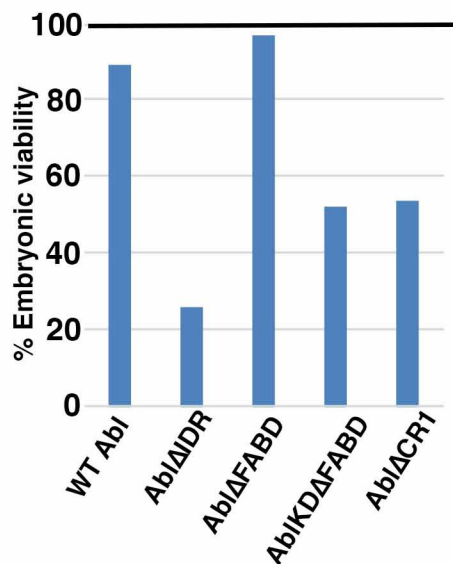

**E**

Rescue of progeny embryonic viability of *abl<sup>1</sup>* germline homozygous females  
*x abl<sup>1</sup>/+* males  
n ≥ 515 animals/genotype

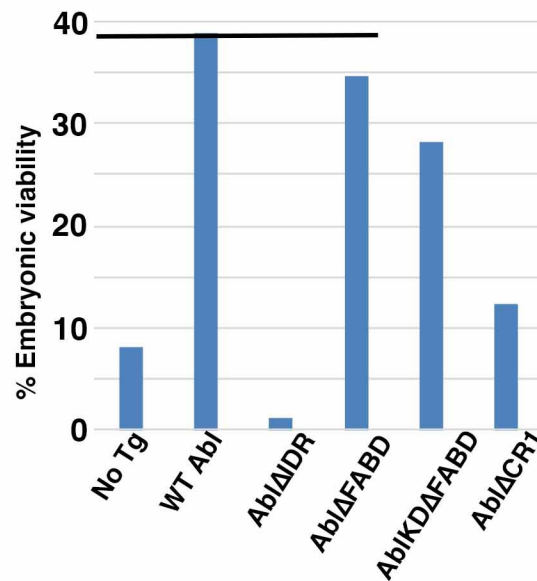

Figure 2. *AblΔIDR* does not rescue embryonic morphogenesis. A-F. Cuticle preparations. Anterior up. A. Wildtype, ventral side right, revealing the segmental array of denticle belts and naked cuticle. Arrowhead: head involution was completed and there is a well-formed head skeleton. Arrow. Germband retraction was completed, positioning the spiracles at the posterior end. Scale bar=50 μm. B-D. Examples of cuticles from progeny of *AblΔIDR; abl<sup>4</sup>/Df* mothers crossed to *abl<sup>4</sup>/+* fathers. B. Least severe phenotype. Head involution, dorsal closure (arrowhead) and germband retraction (arrow) failed. C. Intermediate phenotype, with large hole in the ventral cuticle. D. Severe phenotype. Only fragments of cuticle remain. F. Range of cuticle defects seen in the progeny of females whose germlines are homozygous for *abl<sup>4</sup>* crossed to *abl<sup>4</sup>/+* fathers, carrying the transgenes indicated in G maternally and zygotically. Arrows and arrowheads as in A-D. Images are from Rogers et al., 2016, where we developed this cuticle scoring scheme. G. Frequencies of each phenotype in the indicated genotypes. Statistical test used was Fisher's Exact Test.

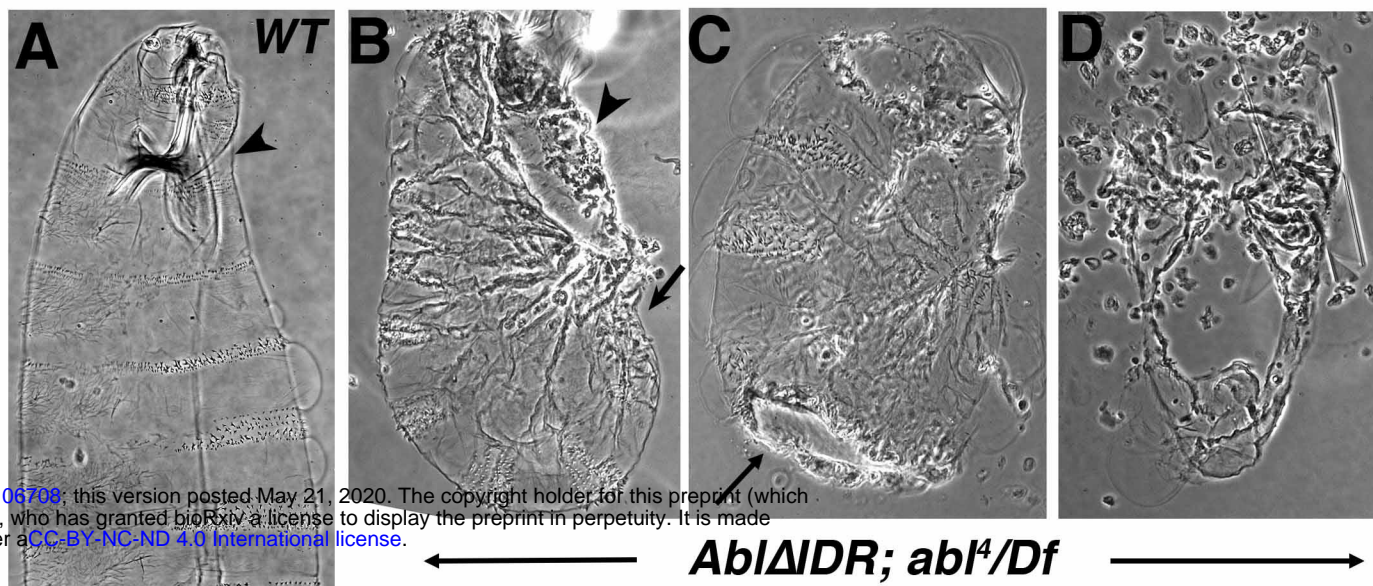

bioRxiv preprint doi: <https://doi.org/10.1101/2020.05.20.106708>; this version posted May 21, 2020. The copyright holder for this preprint (which was not certified by peer review) is the author/funder, who has granted bioRxiv a license to display the preprint in perpetuity. It is made available under aCC-BY-NC-ND 4.0 International license.

**F** Range of defects seen in progeny of females with *abl4* homozygous germlines crossed to *abl4/+* males and rescued by the transgenes indicated below

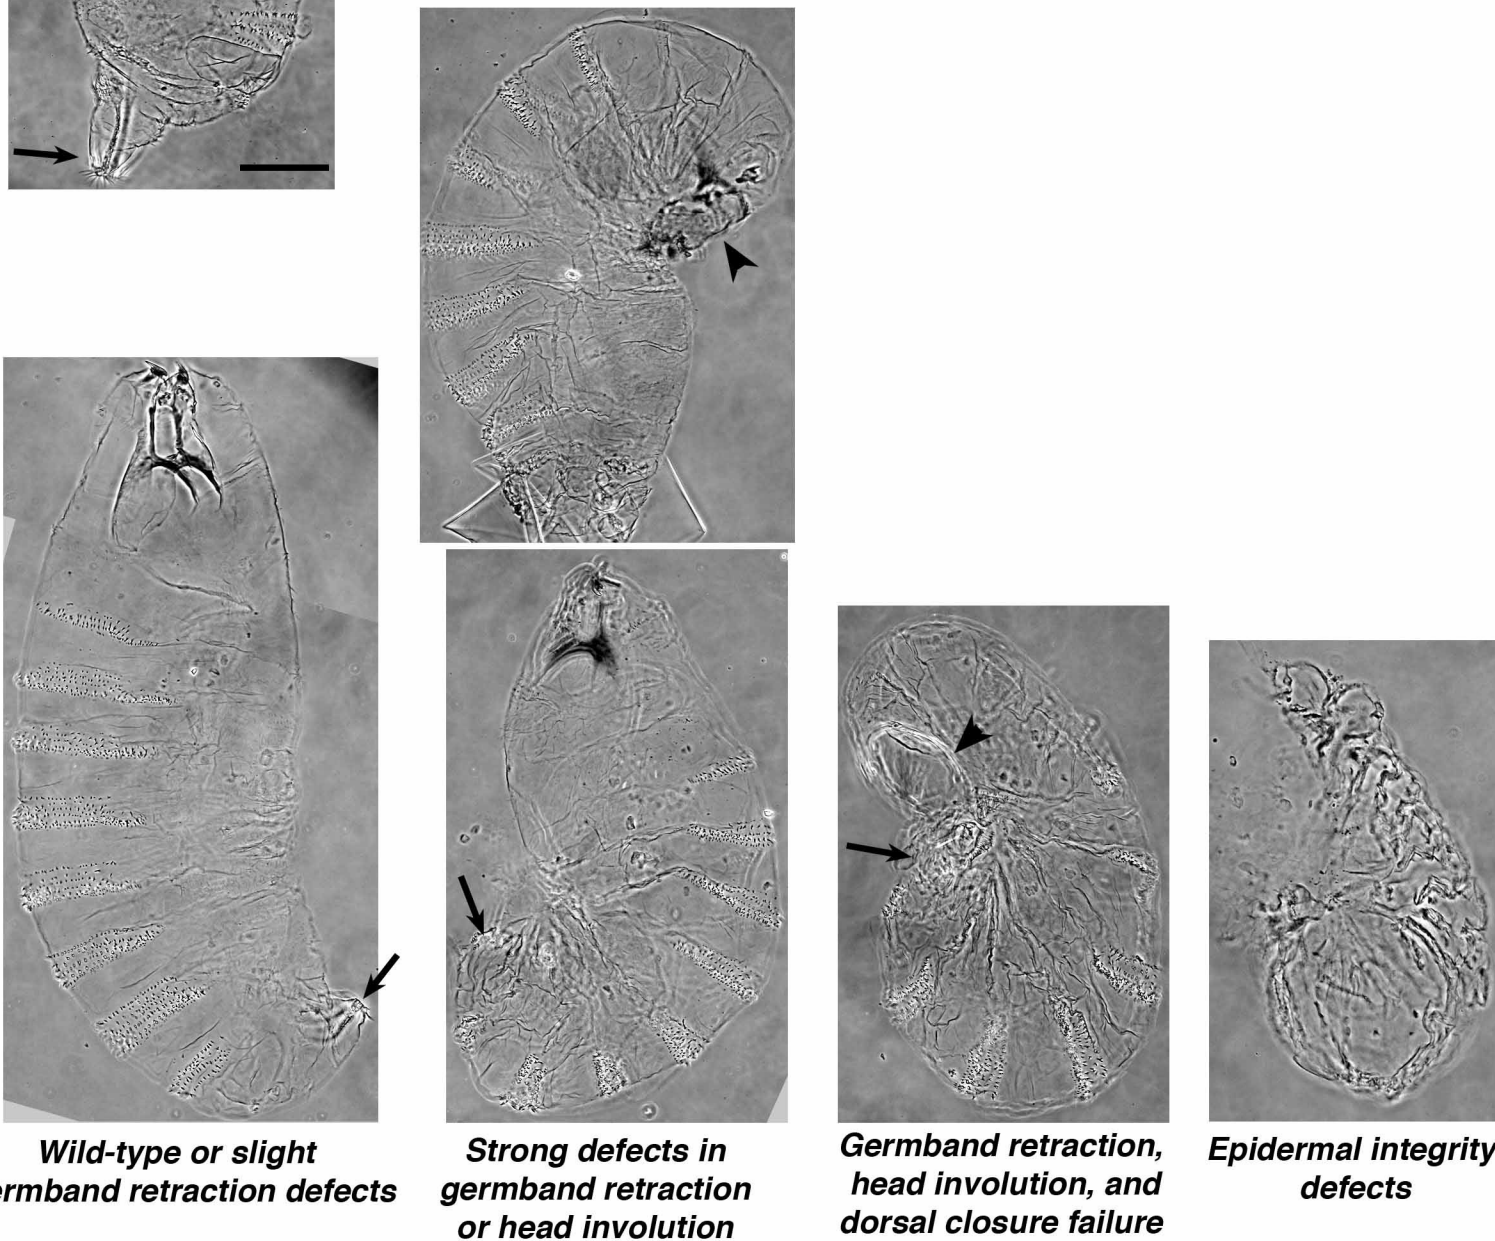

In comparing # in 2 most severe vs. 2 least severe classes probability that this genotype is different than

**G**

| Genotype                            |           |     |     |     | <i>abl<sup>MZ</sup></i> | <i>abl<sup>MZ</sup>; AbiWT</i> |
|-------------------------------------|-----------|-----|-----|-----|-------------------------|--------------------------------|
| <i>abl<sup>MZ</sup></i>             | (n=450) * | 30% | 27% | 28% | 15%                     | N.A.                           |
| <i>abl<sup>MZ</sup>; AbiWT</i>      | (n=252) * | 77% | 9%  | 7%  | 5%                      | p<0.0001                       |
| <i>abl<sup>MZ</sup>; AbiΔLinker</i> | (n=275)   | 29% | 12% | 26% | 33%                     | p<0.0001                       |
| <i>abl<sup>MZ</sup>; AbiΔCR1</i>    | (n=343) * | 55% | 22% | 12% | 9%                      | p<0.0001                       |

\* Data from Rogers et al, 2016 MBoC 27:2613-31

Figure 3. *Abl* $\Delta$ IDR does not effectively rescue defects in cellularization or mesoderm invagination. Embryos, genotypes indicated, anterior left. A-C. Cellularization, Phalloidin stained to reveal f-actin. A. Wildtype. Cellularization was completed normally, producing solely mononucleate cells. B. *ablMZ* mutant. Defects in actin regulation during syncytial development and cellularization led to the formation of multinucleate cells (red arrows). C. *Abl* $\Delta$ IDR; *ablMZ* mutant. *Abl* $\Delta$ IDR fails to rescue the defect in cellularization. D-F. Stage 8 embryos, stained with antibodies to Ecad to visualize cell shapes. D. In wildtype mesoderm invagination is completed normally leaving a straight and even midline (blue arrows). E. *ablMZ* mutant. Defects in mesoderm invagination leave the ventral midline wavy and uneven (blue arrows). Also note the continued presence of multinucleate cells (red arrows). F. *Abl* $\Delta$ IDR; *ablMZ* mutant. *Abl* $\Delta$ IDR fails to fully rescue the defect in mesoderm invagination, leaving a wavy midline (blue arrows). Multinucleate cells remain (red arrows). Scale bar=15  $\mu$ m.



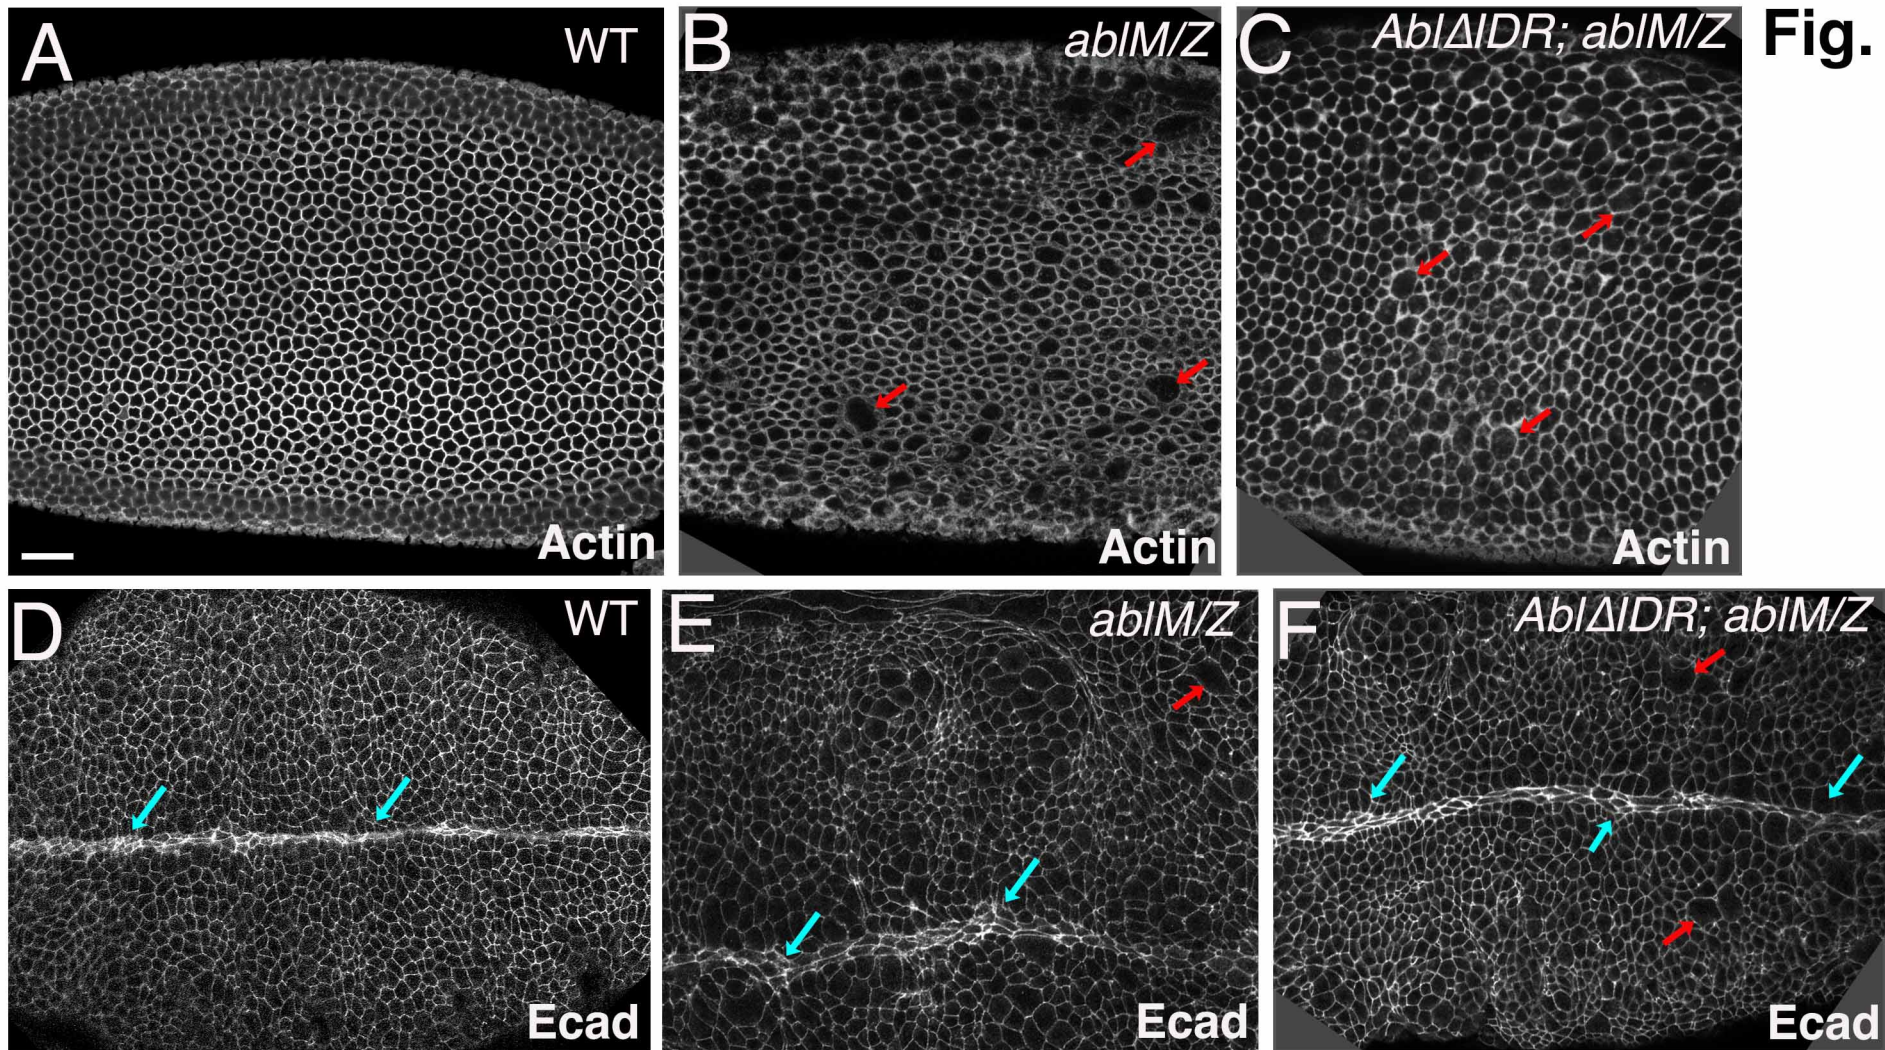

Figure 4. *AbiΔIDR* does not rescue defects in germband retraction or dorsal closure. Embryos stage 13-14, anterior left, dorsal (A-G) or lateral (H-J) views, stained with antibodies to Ecad to visualize cell shapes. A,B. Wildtype embryos, dorsal view, at successively later stages of dorsal closure. The embryo is enclosed ventrally and laterally by epidermis but the dorsal surface remains covered by the amnioserosa (AS). The leading edge is straight (blue arrows) and as closure proceeds the epidermis meets and zips at the canthi (red arrows). C. Representative *abIMZ* mutant. Dorsal closure and germband retraction are disrupted. The spiracles remain dorsally, the leading edge is wavy rather than straight (blue arrows), zipping at the canthi is slowed or halted (red arrows), and in places the amnioserosa has ripped from the leading edge, exposing underlying tissue (asterisk). D-G. *AbiΔIDR; abIMZ* mutants, illustrating the range of defects in dorsal closure. D. Relatively mild phenotype, with closure nearly completed. However, the leading edge is wavy (blue arrows) and the spiracles are present dorsally, revealing failure to complete germband retraction. E,F. More typical *AbiΔIDR; abIMZ* mutants, with a very wavy leading edge (blue arrows), slowed zippering at the canthi (red arrows), and ripping of the amnioserosa from the epidermis (asterisk). G. *AbiΔIDR; abIMZ* mutants where zippering has happened at the posterior canthus but not the anterior one (red arrows). H-J. Most severe class of *AbiΔIDR; abIMZ* mutants, in which the epidermis is reduced in extent, very deep and persistent segmental grooves remain (green arrows) and many multinucleate cells are sometimes observed (J, yellow arrows). Scale bar = 15 μm.

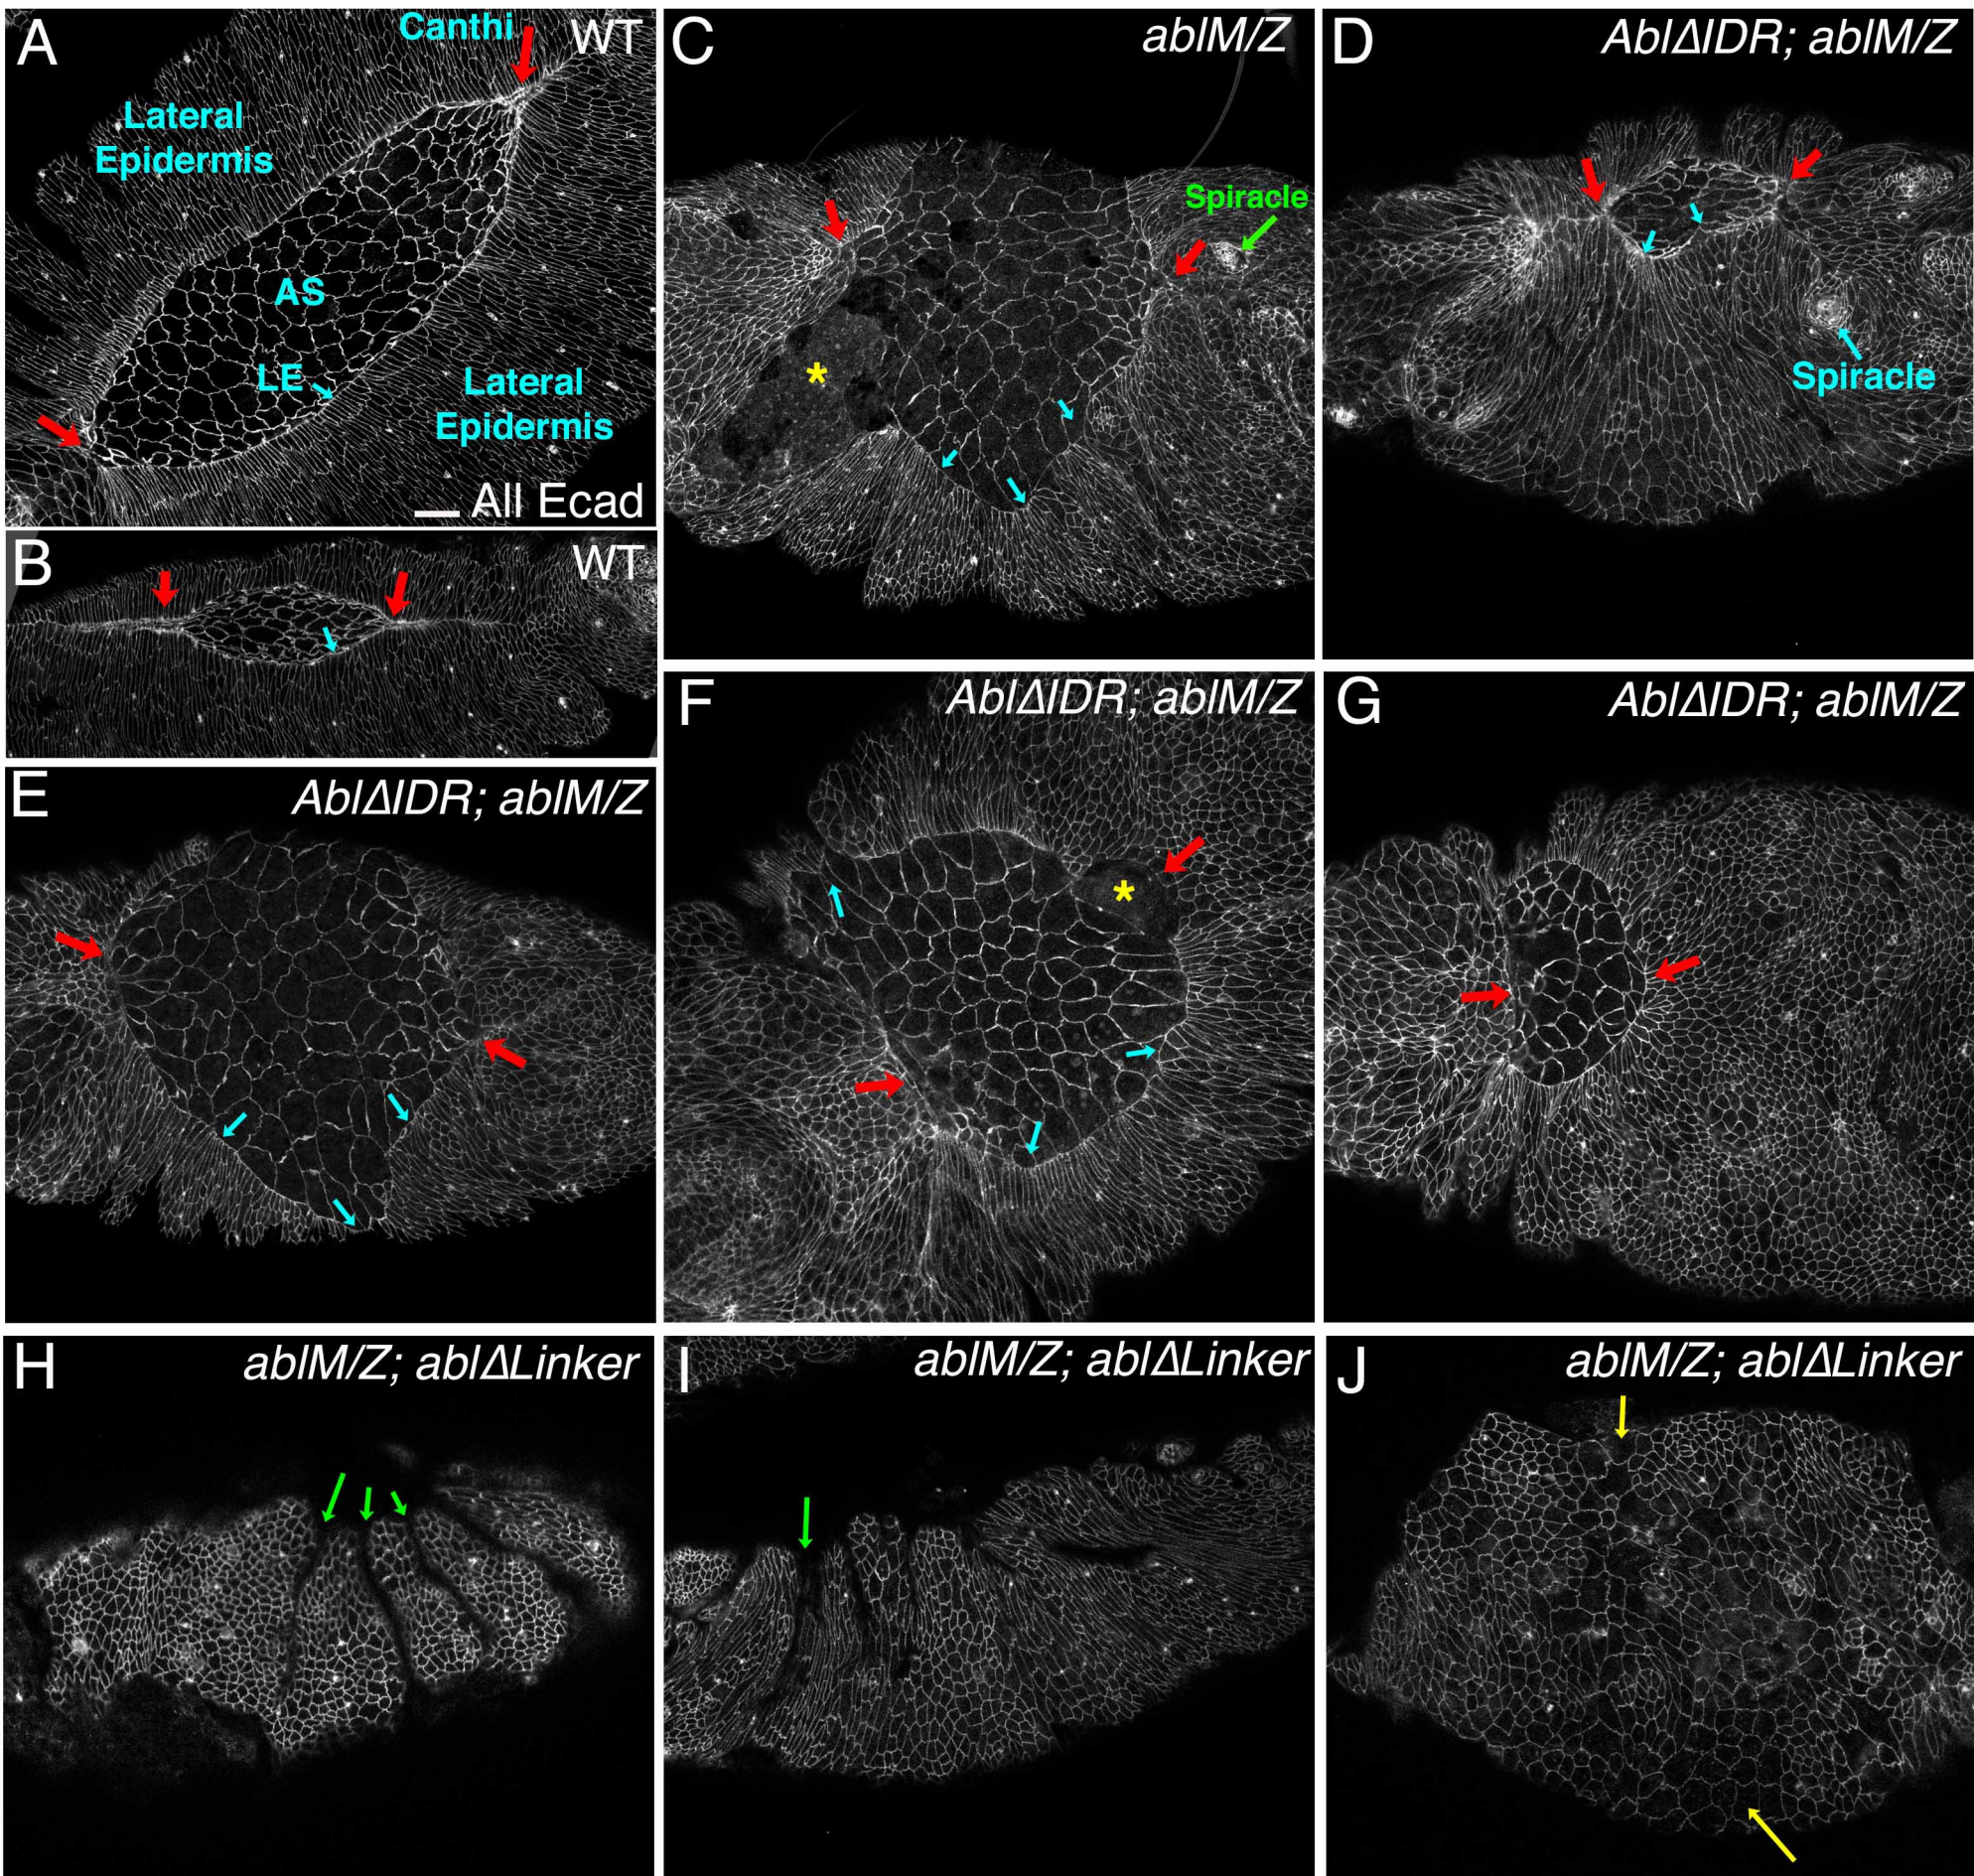

**Fig. 4**

Figure 5. *Abl* $\Delta$ DR does not rescue defects leading edge cell shape. Leading edge, stage 13-14 embryos, anterior left, dorsal up, stained with antibodies to Ecad to visualize cell shapes. A. Wildtype. The leading edge is straight, with even cell widths at the leading edge (blue arrows), excepting the slightly increased width at the positions of segmental grooves (red arrowheads). Scale bar=10 $\mu$ m. B,C. Representative *Abl* $\Delta$ DR; *ablMZ* mutants. Leading edge cells are uneven in width, with some splayed open (magenta arrows) and some hyperconstricted (yellow arrows). Groups of cells also fail to elongate (red asterisks). D. *Abl* $\Delta$ DR; *ablMZ* mutant. Green asterisks indicate large multinucleate cells. E. *Abl* $\Delta$ DR; *ablMZ* mutant. Similar cell shape defects are seen in embryos that have completed or almost completed closure.

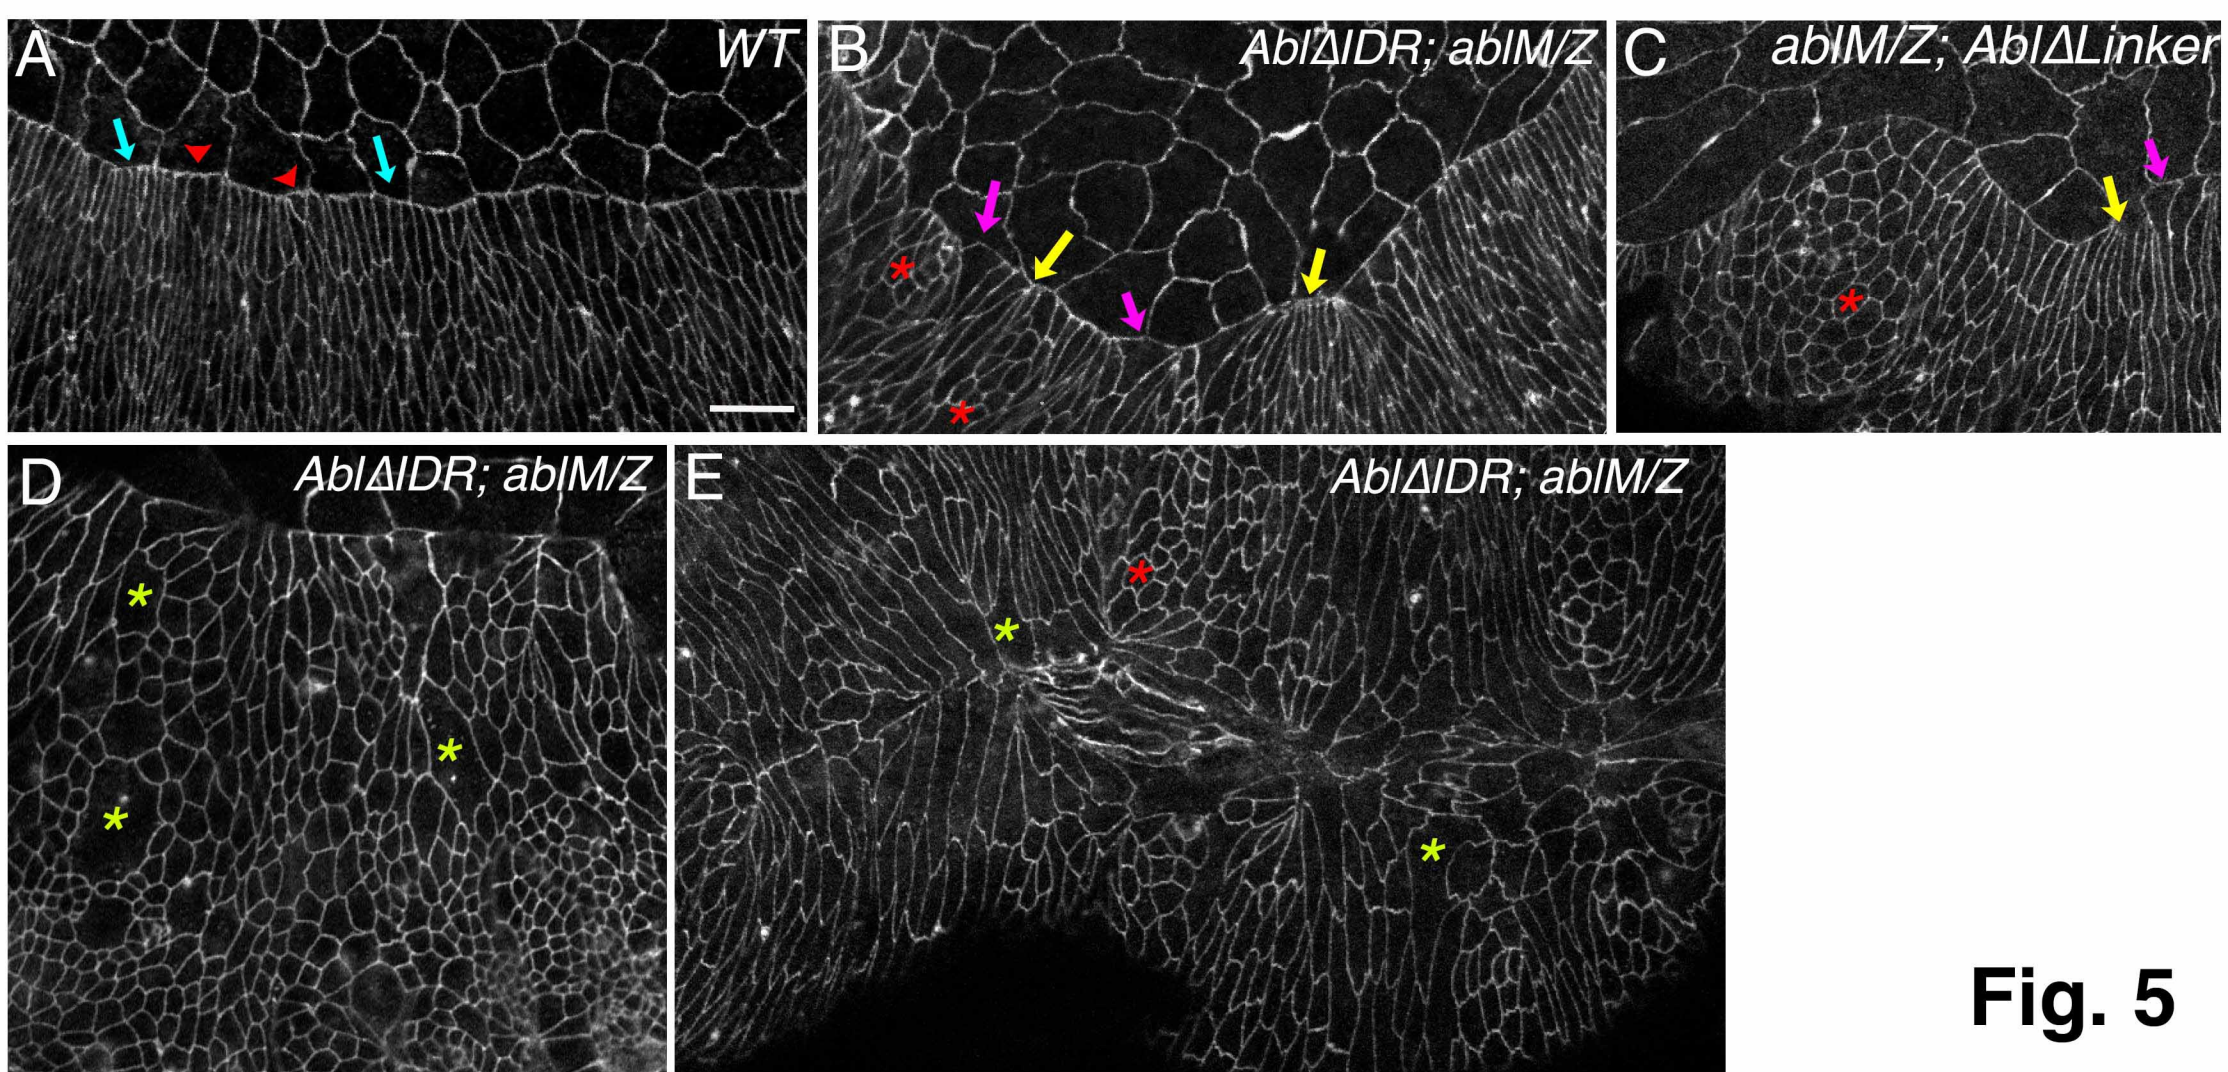

**Fig. 5**

Figure 6. *AblΔIDR* does not rescue defects in Ena localization or actin regulation. Leading edge, stage 13-14 embryos, anterior left, dorsal up, stained to visualize Ecad and Ena ((A-D) or Ecad and actin (F,G)). A. Wildtype. Ena localizes cortically in both amnioserosal and epidermal cells. Ena is prominently enriched at leading edge tricellular junctions (red arrows), and is enriched at lower levels at tricellular junctions in the lateral epidermis (yellow arrows). Scale bar=10μm. B-D. *AblΔIDR; abIMZ* mutants. While Ena remains cortical and is enriched at lateral epidermal tricellular junctions (yellow arrows), uniform Ena enrichment at leading edge tricellular junctions is lost. While some tricellular junctions retain Ena enrichment (red arrows), at others Ena enrichment is reduced (blue arrows) or Ena is found all along the leading edge (green arrows). E. Wildtype. Actin is found cortically in all epidermal cells but is enriched in the leading edge actin cable (red). F. *AblΔIDR; abIMZ* mutant. While most cells still have actin along the leading edge, actin intensity varies from lower (blue arrows) to much higher than normal (green arrows). Actin is also elevated at tricellular junctions of lateral epidermal cells (yellow arrows).

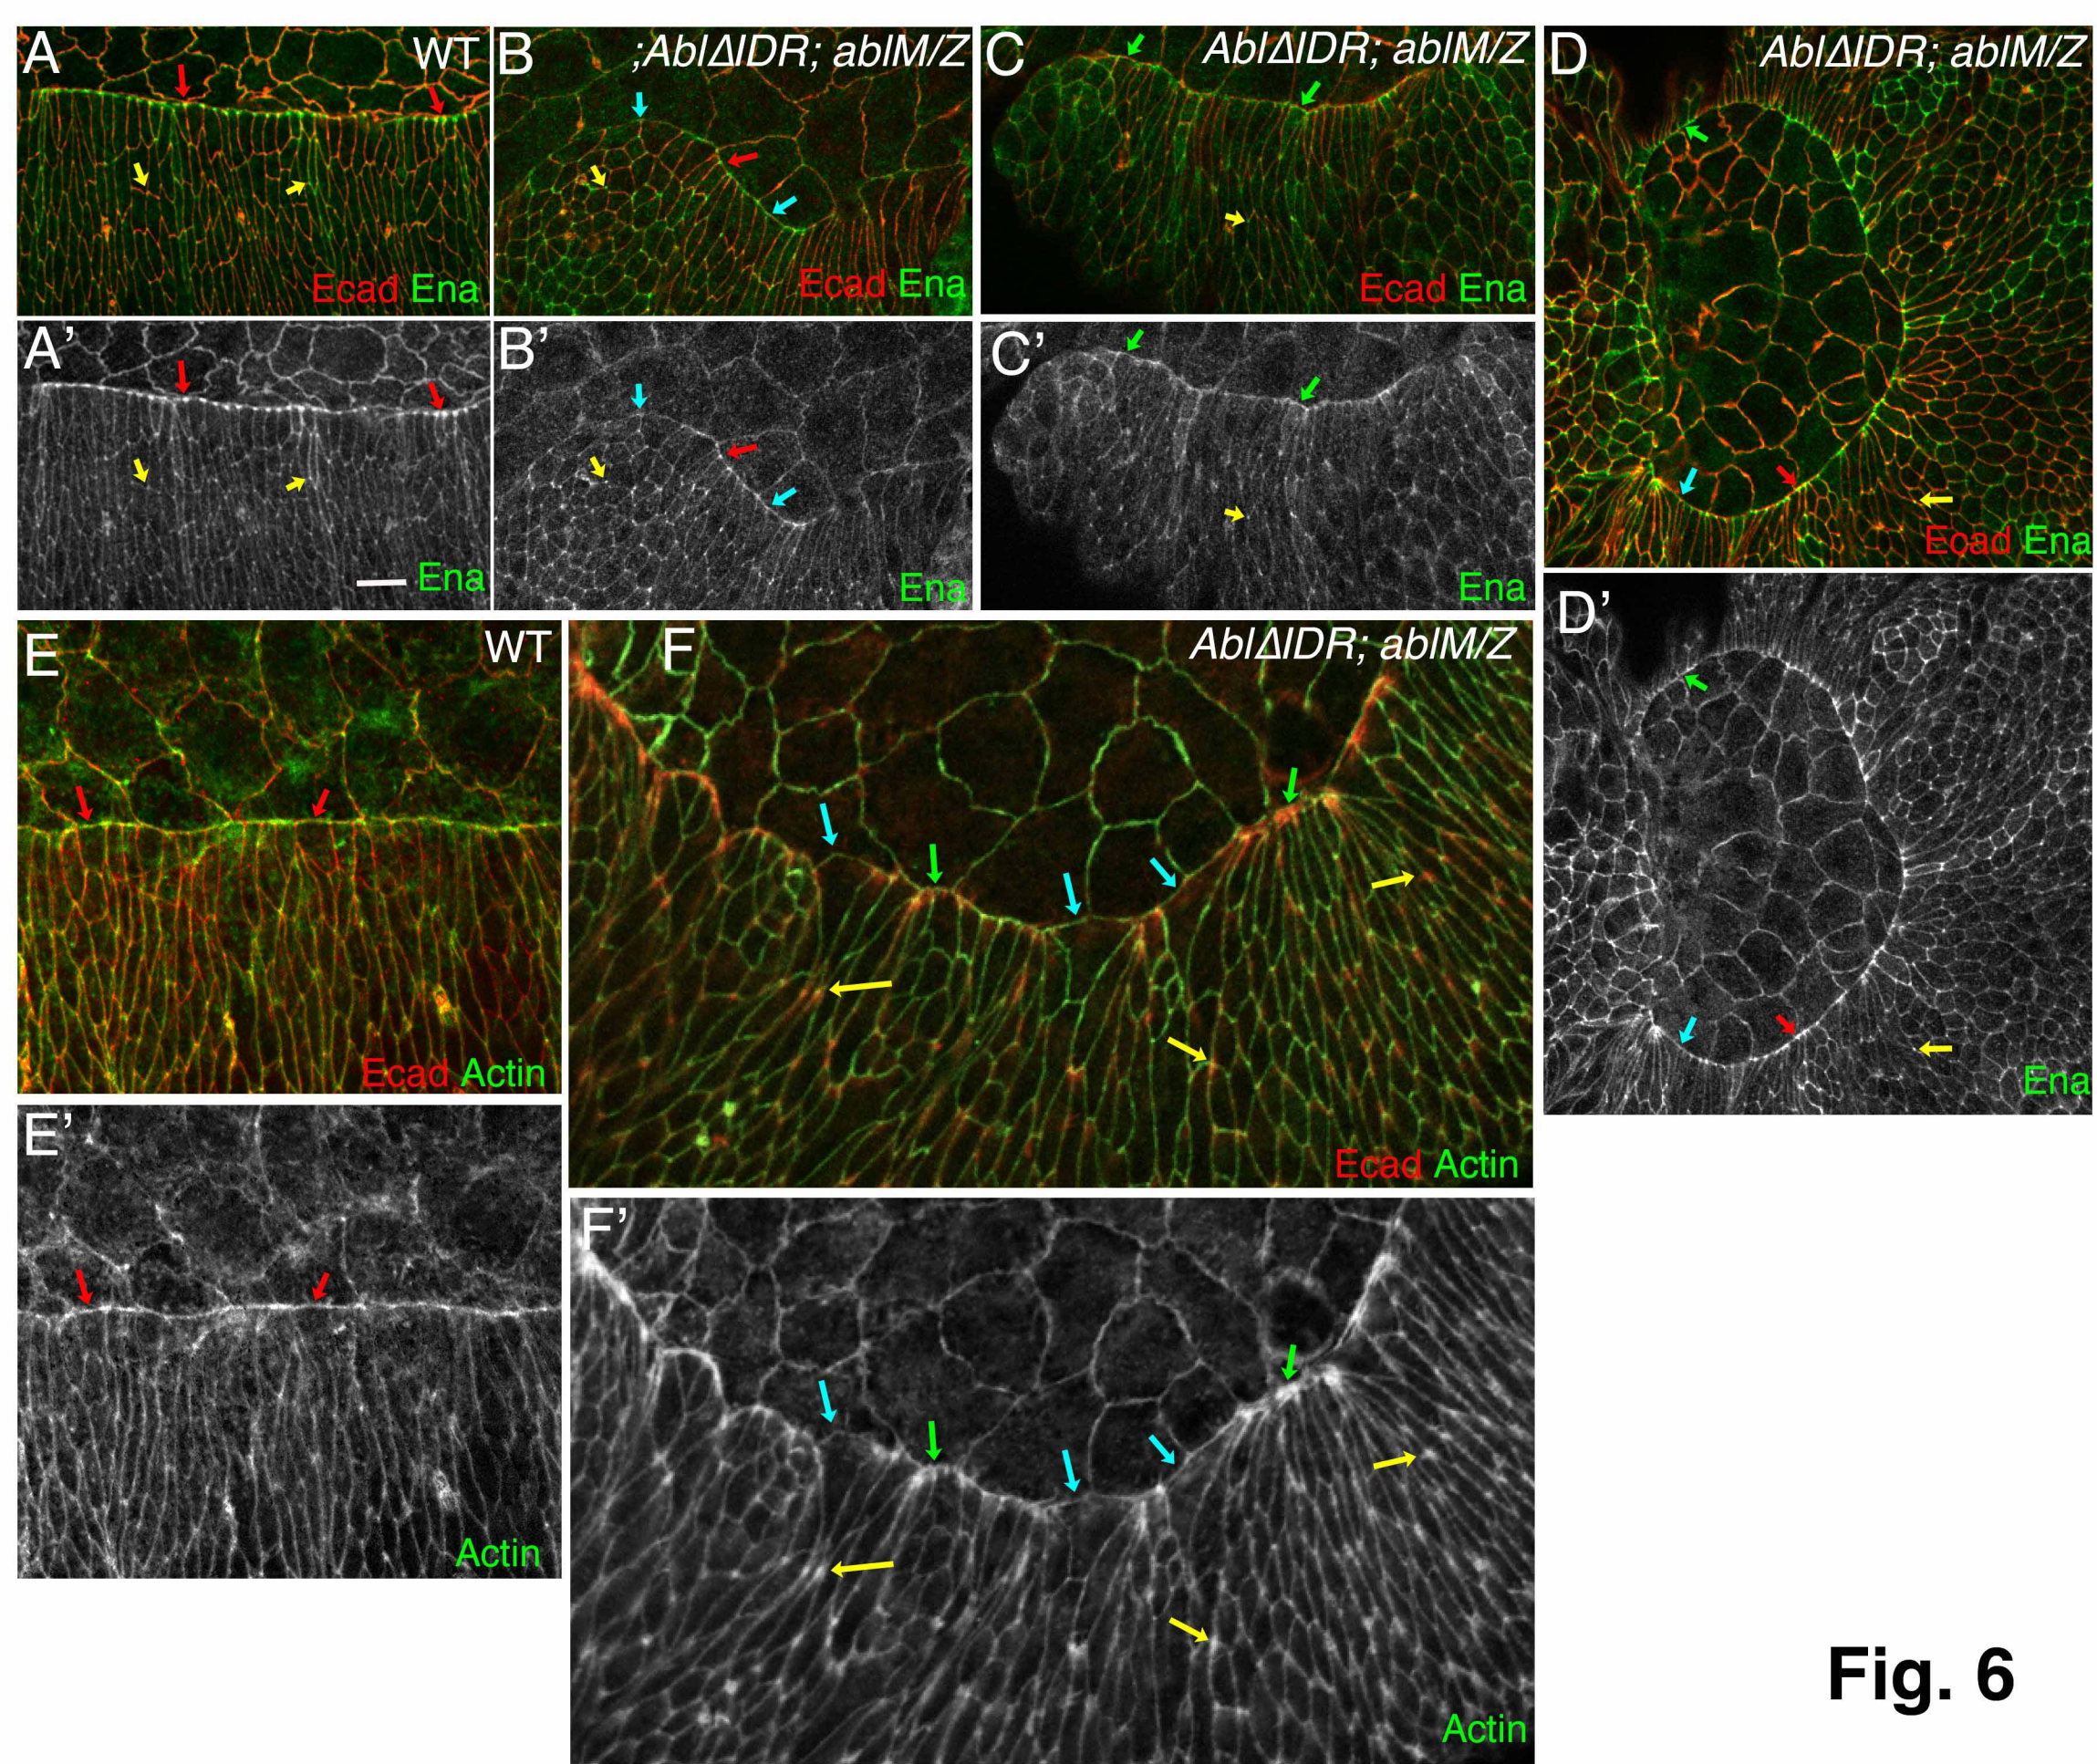

**Fig. 6**

Figure 7. Abl $\Delta$ IDR:GFP protein is still enriched at the cell cortex, like wildtype Abl. A-E. Embryos, stages indicated, anterior left. Fixed and stained for Ecad, with the GFP-tagged Abl proteins directly visualized by GFP fluorescence. Scale bars=15 $\mu$ m. A-C. During the extended germband stage, both wildtype Abl:GFP and Abl $\Delta$ IDR:GFP have a cytoplasmic pool and are enriched at the cell cortex, as we previously observed is the case for endogenous Abl. D,E. Cortical enrichment of both wildtype Abl:GFP and Abl $\Delta$ IDR:GFP is reduced during dorsal closure. F,G. Live imaging of syncytial stage embryos. Wildtype Abl:GFP is clearly cortical but Abl $\Delta$ IDR:GFP is found throughout the cell.



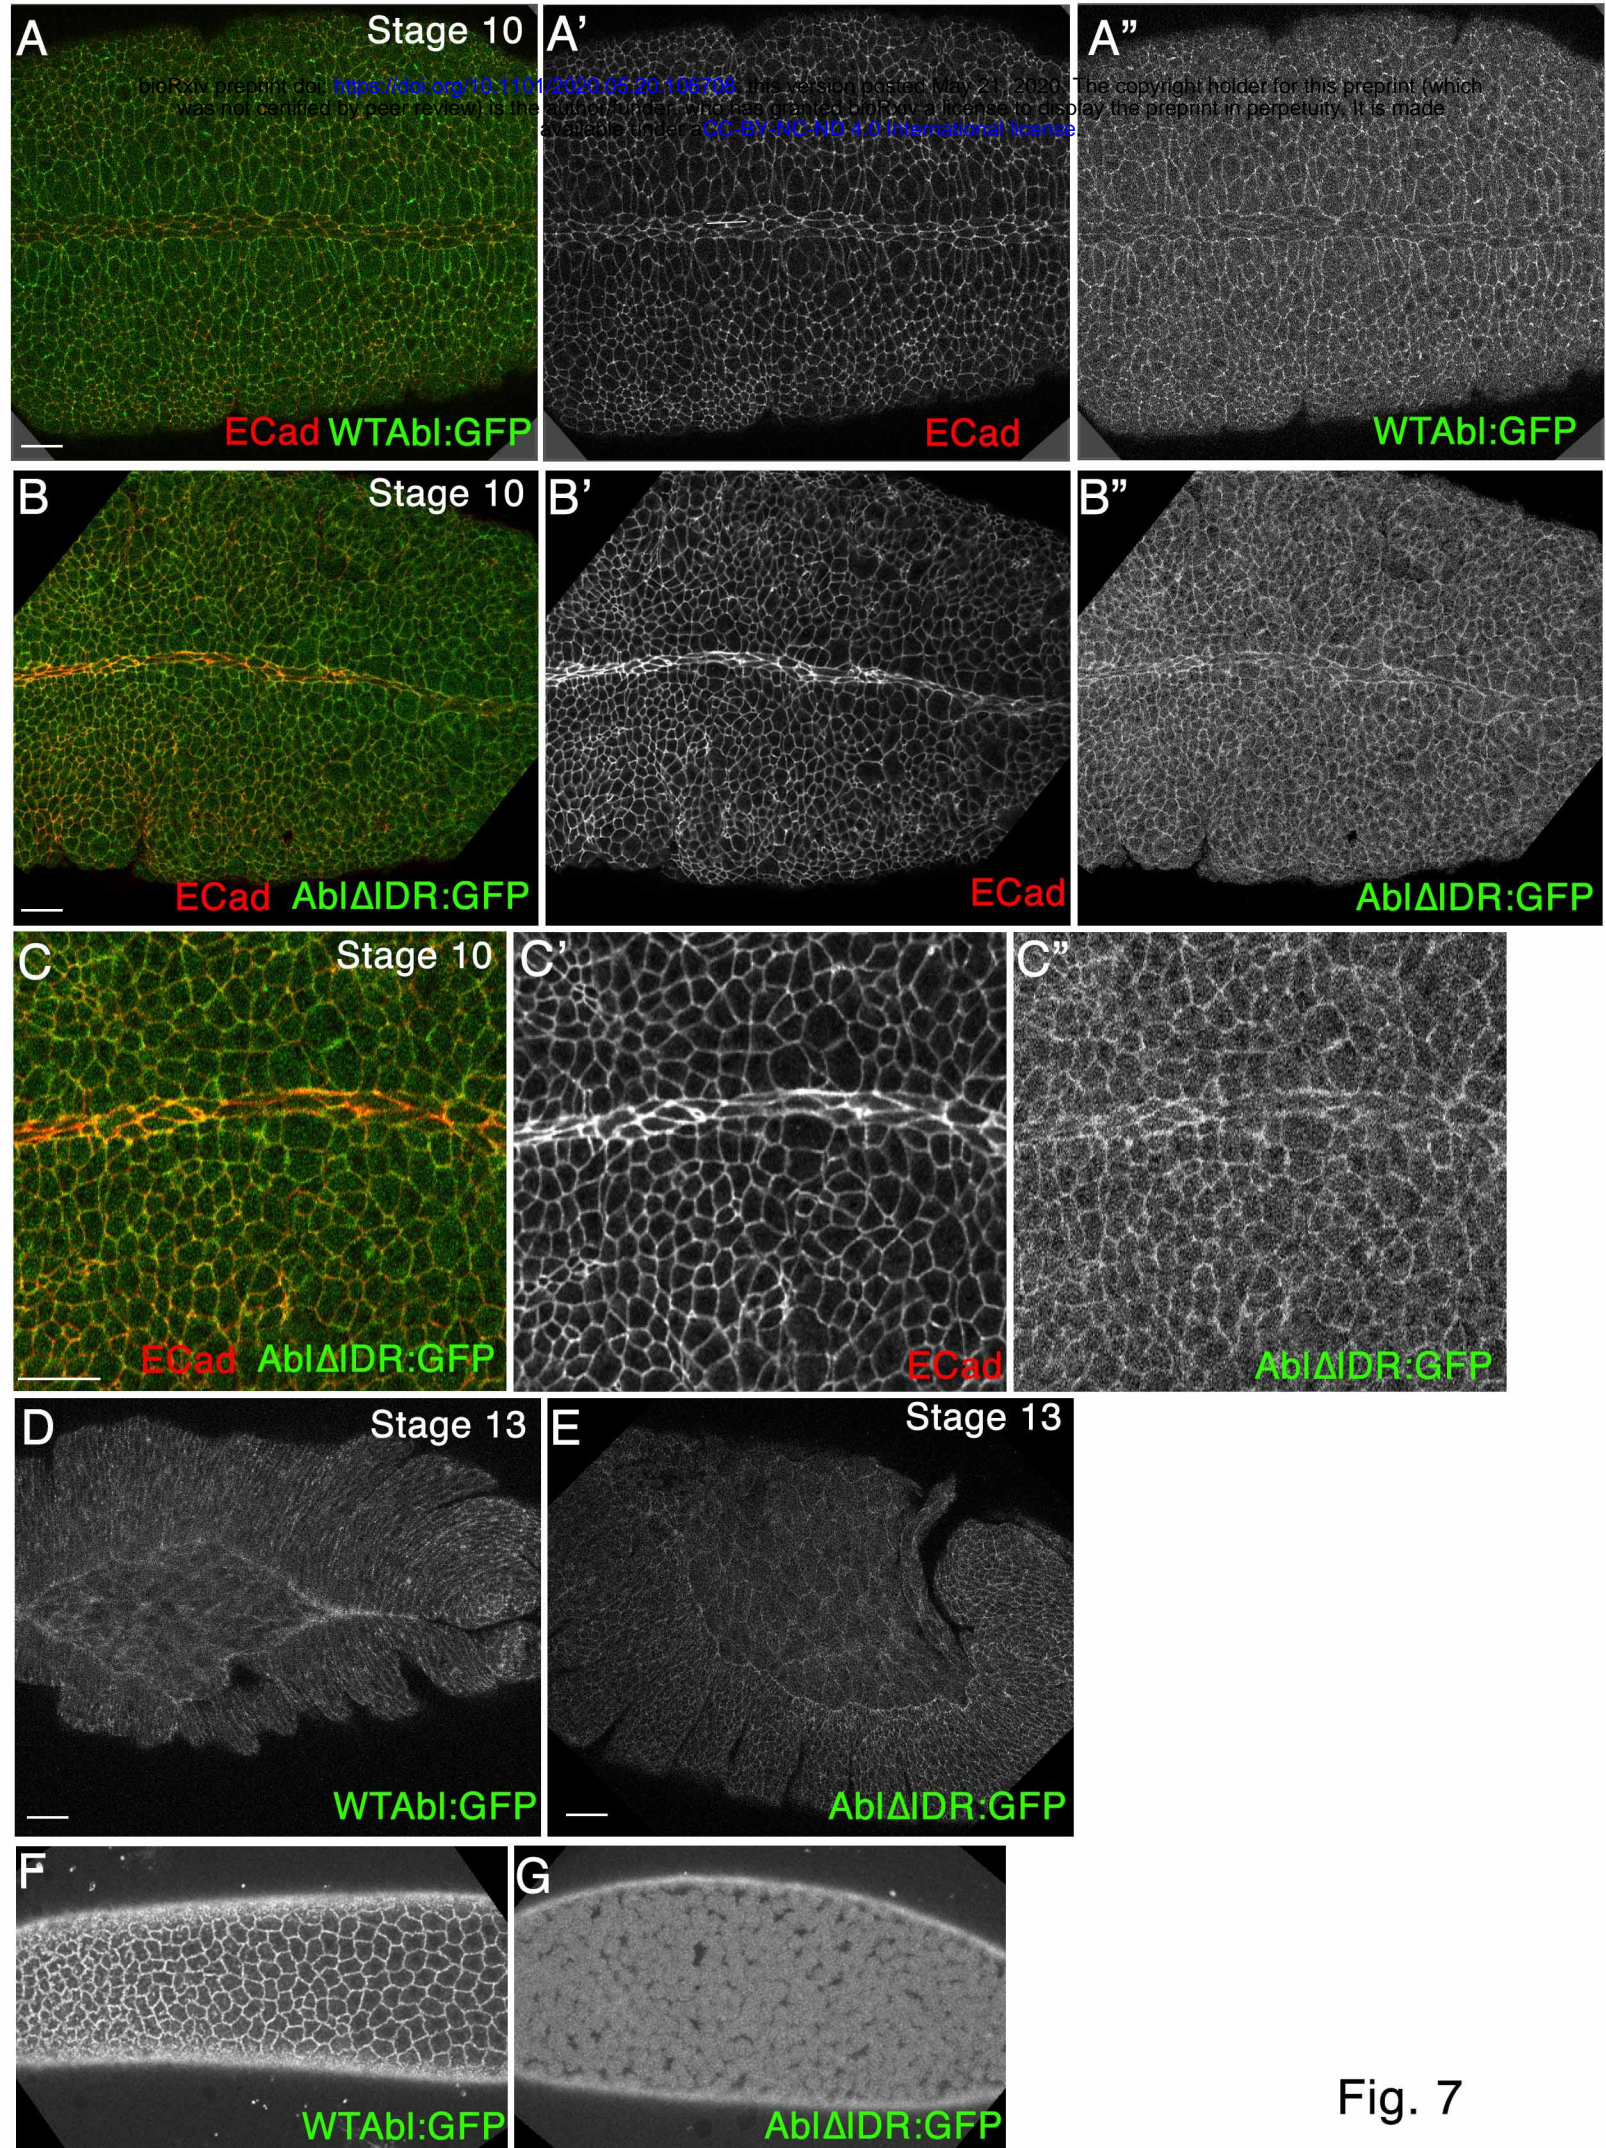

Fig. 7

Figure 8. Abl $\Delta$ IDR protein accumulates at much higher levels than wildtype Abl. A. Immunoblot of 0-6 hr embryonic extracts, blotted with antibody to GFP to detect our transgenic proteins. Tubulin serves as a loading control. Despite the fact that both transgenes are driven by the same endogenous *abl* promoter, Abl $\Delta$ IDR protein accumulates at much higher levels than wildtype Abl. C. Quantification of mean protein levels from four immunoblots, normalized to both wildtype Abl:GFP and using the loading controls. Colored dots indicate values of the individual blots and error bar = standard error of the mean. C. Immunoblot of extracts of Drosophila S2 cells expressing transgenes encoding wildtype Abl:GFP or Abl $\Delta$ IDR, both expressed under control of the metallothionine promoter, blotted with antibody to GFP to detect our transgenic proteins. D. Representative images of transfected S2 cells stained to visualize F-actin and our transgenic Abl proteins. Wildtype Abl:GFP is enriched in the lamellipodium (arrowhead; highlighted by F-actin) and excluded from nuclei (arrow), while Abl $\Delta$ IDR:GFP is not enriched in the lamellipodium or excluded from nuclei.

## A

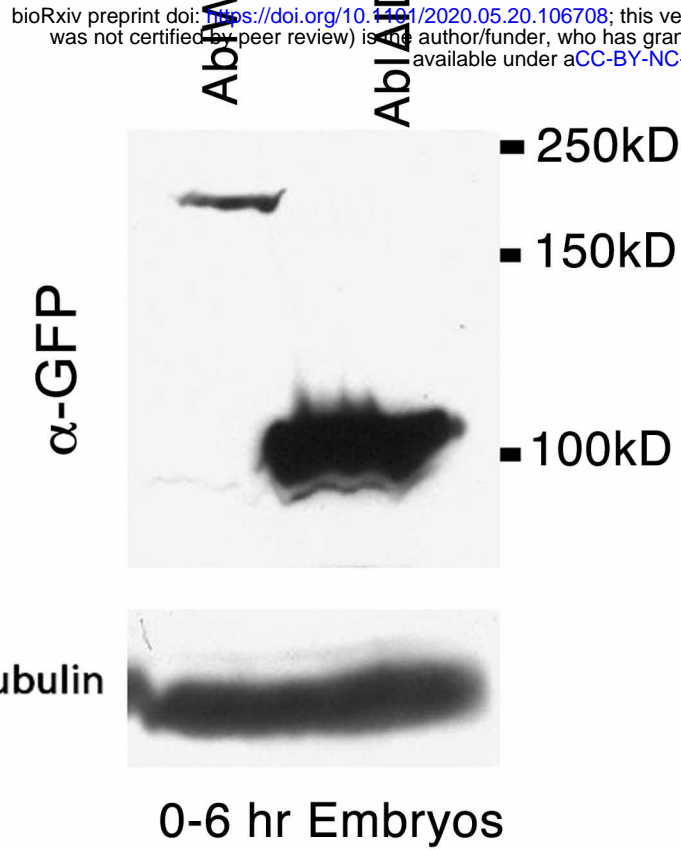

## B

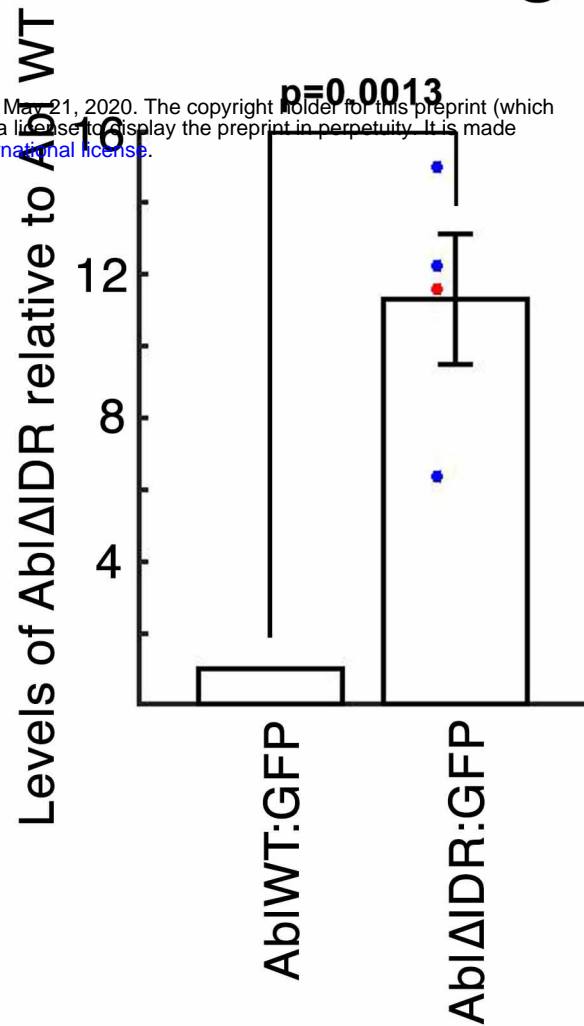

## C

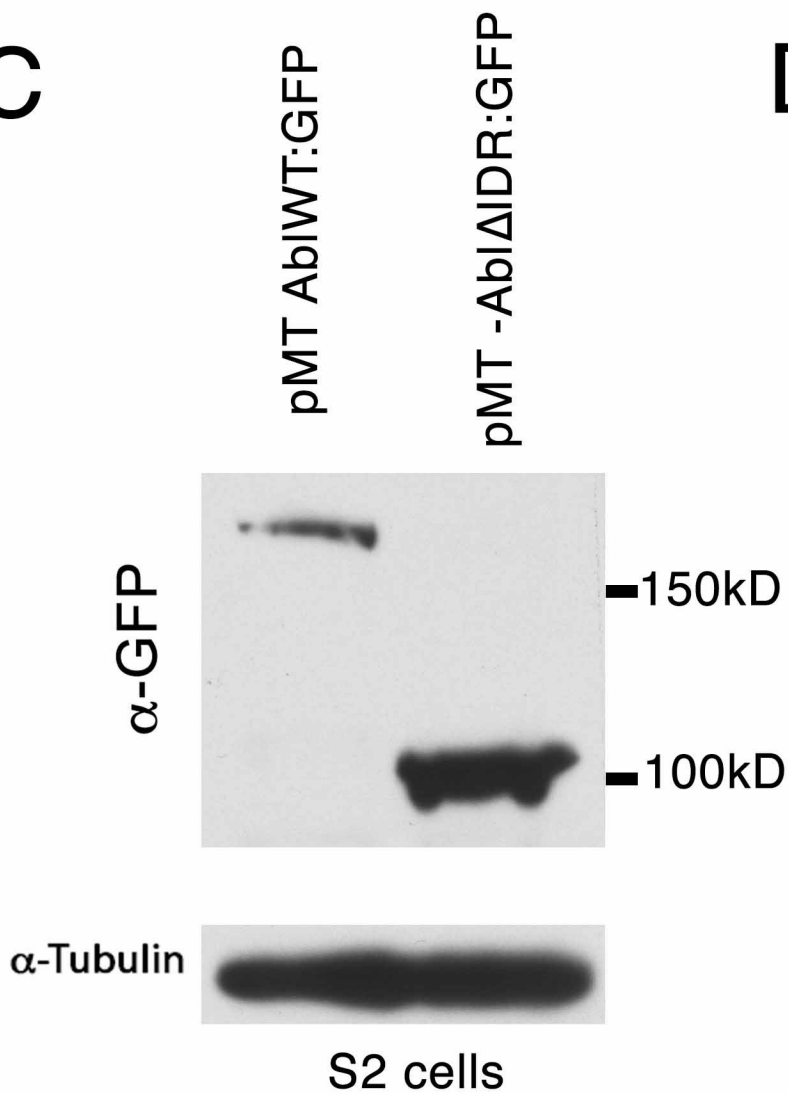

## D

### pMT Abi WT::GFP

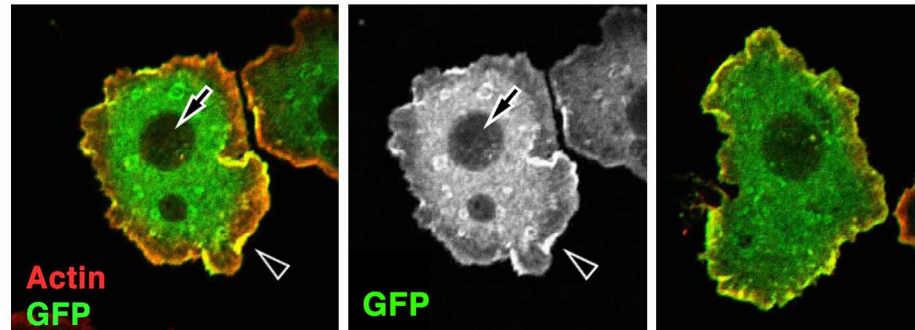

### pMT Abi Δ Linker::GFP

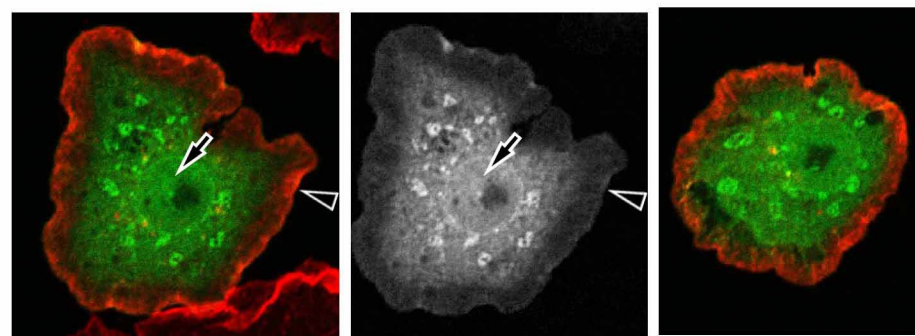

Source: https://biorxiv.org/content/10.1101/2020.05.20.106708v1.full.pdf
